# Supplementary material for: Cell microparticles loaded with tumor antigen and resiquimod reprogram tumor-associated macrophages and promote stem-like CD8+ T cells to boost anti-PD-1 therapy
Source: Springer Nature journal article supplement (doi:10.1038/s41467-023-41438-9), 2023-09-13
Supplement: MOESM1 [file 41467_2023_41438_MOESM1_ESM.pdf]

## Supplementary Information

### **Cell microparticles loaded with tumor antigen and resiquimod reprogram tumor-associated macrophages and promote stem-like CD8<sup>+</sup> T cells to boost anti-PD-1 therapy**

Xiaoqiong Zhang<sup>1,#</sup>, Zhaohan Wei<sup>1,#</sup>, Tuying Yong<sup>1,2,3,4,#</sup>, Shiyu Li<sup>1</sup>, Nana Bie<sup>1</sup>, Jianye Li<sup>1</sup>, Xin Li<sup>1</sup>, Haojie Liu<sup>1</sup>, Hang Xu<sup>2</sup>, Yuchen Yan<sup>1</sup>, Bixiang Zhang<sup>5</sup>, Xiaoping Chen<sup>5</sup>, Xiangliang Yang<sup>1,2,3,4,\*</sup> and Lu Gan<sup>1,2,3,4,\*</sup>

<sup>1</sup>National Engineering Research Center for Nanomedicine, College of Life Science and Technology, Huazhong University of Science and Technology, Wuhan 430074, China

<sup>2</sup>Key Laboratory of Molecular Biophysics of the Ministry of Education, College of Life Science and Technology, Huazhong University of Science and Technology, Wuhan 430074, China

<sup>3</sup>Hubei Key Laboratory of Bioinorganic Chemistry and Materia Medica, Huazhong University of Science and Technology, Wuhan 430074, China

<sup>4</sup>Hubei Bioinformatics and Molecular Imaging Key Laboratory, Huazhong University of Science and Technology, Wuhan 430074, China

<sup>5</sup>Hepatic Surgery Center, Tongji Hospital, Tongji Medical College, Huazhong University of Science and Technology, Wuhan 430030, China.

<sup>#</sup>Xiaoqiong Zhang, Zhaohan Wei and Tuying Yong contributed equally to this work.

\*Correspondence should be addressed to: [lugan@mail.hust.edu.cn](mailto:lugan@mail.hust.edu.cn), [yangxl@mail.hust.edu.cn](mailto:yangxl@mail.hust.edu.cn).

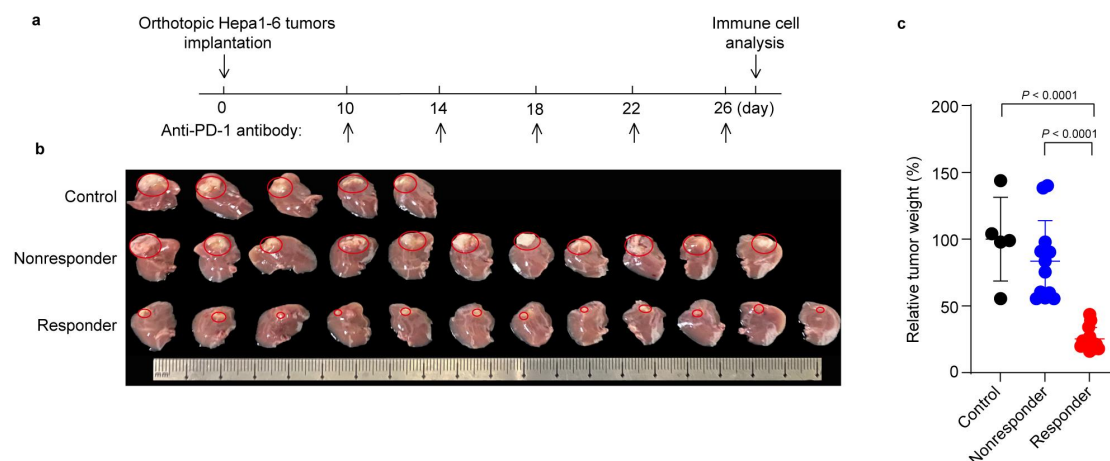

**Supplementary Fig. 1 Anticancer activity of anti-PD-1 antibody in orthotopic Hepa1-6 tumor-bearing mice.** (a) Schematic schedule for tumor inhibition and immune cell analysis experiment in orthotopic Hepa1-6 tumor-bearing mice after intraperitoneal injection of anti-PD-1 antibody at the dosage of  $5 \text{ mg kg}^{-1}$ . (b,c) Tumor image (b) and tumor weight (c) of PBS-, anti-PD-1 antibody-responsive and anti-PD-1 antibody-nonresponsive mice after treatment indicated in (a). Data are presented as means  $\pm$  s.d. ( $n = 5$  mice for PBS-treated group,  $n = 11$  mice for nonresponsive group,  $n = 12$  mice for responsive group; one-way ANOVA followed by Tukey's HSD post-hoc test). Source data are provided as a Source Data file.

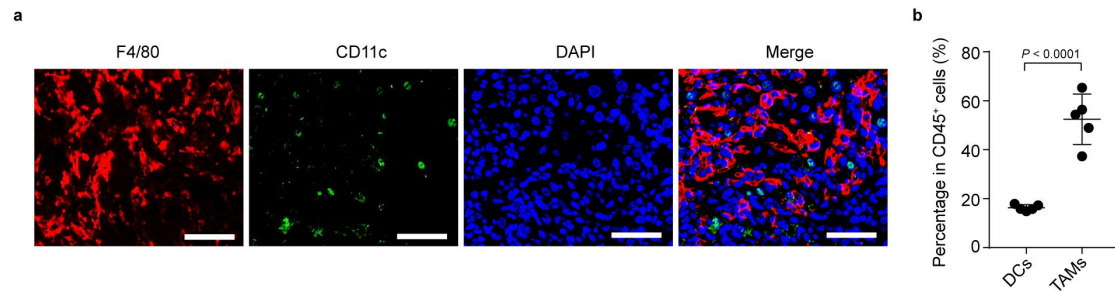

**Supplementary Fig. 2 Distribution of DCs and TAMs in tumors of orthotopic Hepa1-6 tumor-bearing mice.** (a) Immunofluorescence images of F4/80 (TAMs marker) and CD11c (DCs marker) in the tumor tissues of orthotopic Hepa1-6 tumor-bearing mice at 27 days after tumor inoculation. Scale bars: 50  $\mu$ m. Images are representative of three independent samples. (b) The percentages of DCs (gated as CD45<sup>+</sup>F4/80<sup>-</sup>CD11c<sup>+</sup>) and TAMs (gated as CD45<sup>+</sup>CD11b<sup>+</sup>F4/80<sup>+</sup>) in CD45<sup>+</sup> cells in the tumor tissues of orthotopic Hepa1-6 tumor-bearing mice at 27 days after tumor inoculation by flow cytometry. Data are presented as means  $\pm$  s.d. (n = 5 mice per group; unpaired two-tailed Student's *t*-test). Source data are provided as a Source Data file.

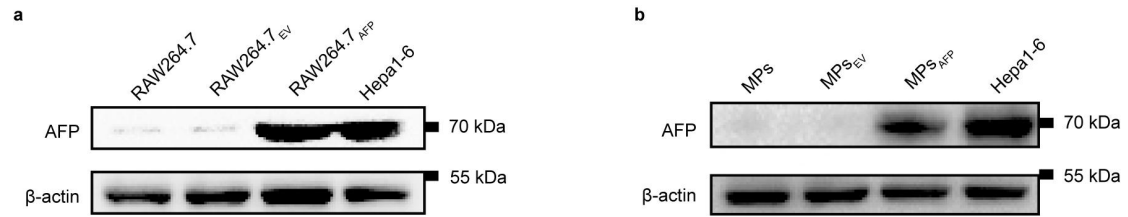

**Supplementary Fig. 3 AFP expression in RAW264.7<sub>AFP</sub> cells and MPs<sub>AFP</sub>.** (a) AFP expression in RAW264.7 cells, RAW264.7 cells stably transfected with empty vector (RAW264.7<sub>EV</sub>) and RAW264.7<sub>AFP</sub> cells by western blotting. (b) AFP expression in MPs, MPs<sub>EV</sub> and MPs<sub>AFP</sub> by western blotting. Hepa1-6 cells were used as a positive control. Images are representative of three independent samples.

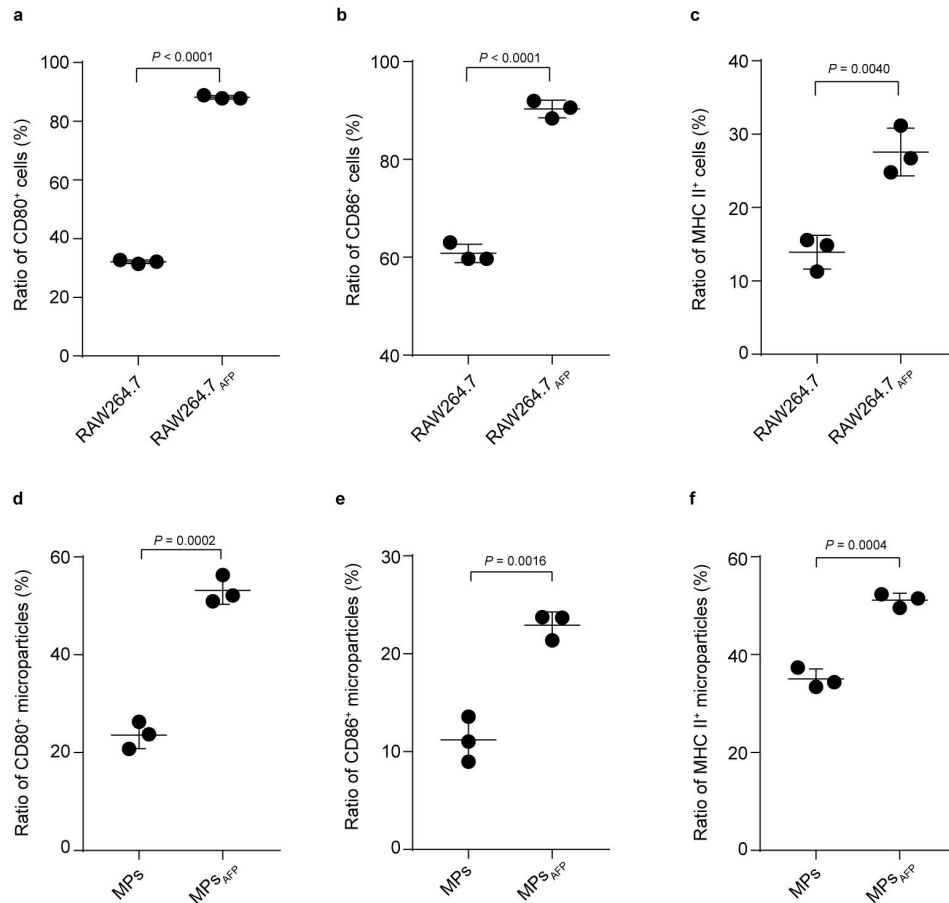

**Supplementary Fig. 4 Effects of AFP overexpression on RAW264.7 cells. (a-c)**

Percentages of CD80<sup>+</sup> (a), CD86<sup>+</sup> (b) and MHC II<sup>+</sup> (c) cells in RAW264.7 and RAW264.7<sub>AFP</sub> cells. Data are presented as means  $\pm$  s.d. ( $n = 3$  biological independent samples; unpaired two-tailed Student's *t*-test). (d-f) Percentages of CD80<sup>+</sup> (d), CD86<sup>+</sup> (e) and MHC II<sup>+</sup> (f) MPs derived from RAW264.7 and RAW264.7<sub>AFP</sub> cells. Data are presented as means  $\pm$  s.d. ( $n = 3$  biological independent samples; unpaired two-tailed Student's *t*-test). Source data are provided as a Source Data file.

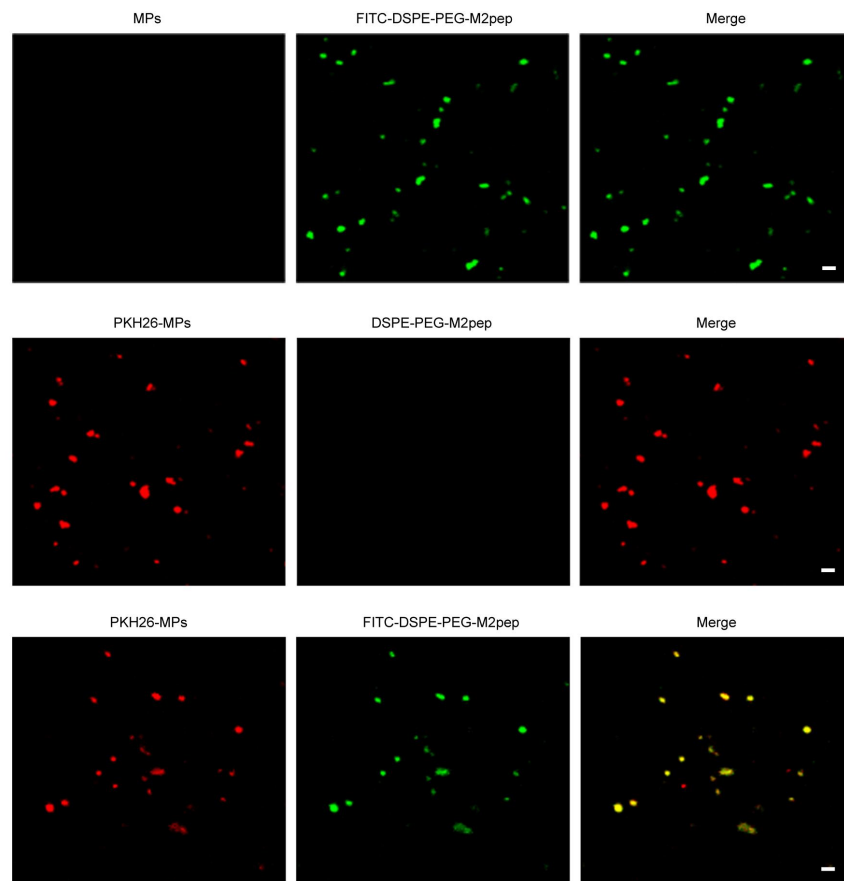

**Supplementary Fig. 5 Colocalization of M2pep and MPs in M2pep-MPs by confocal microscopy.** M2pep-MPs were prepared by incubating PKH26-labeled MPs with FITC-labeled DSPE-PEG-M2pep at a mass ratio of 50:1 at 4 °C for 24 h and then observed by confocal microcopy. Scale bars: 1  $\mu$ m. Images are representative of three independent samples.

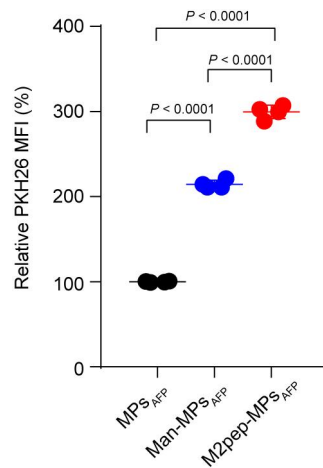

**Supplementary Fig. 6 Targeting capacity of Man-MP<sub>S</sub><sub>AFP</sub> and M2pep-MP<sub>S</sub><sub>AFP</sub> to M2-like macrophages.** IL-4-stimulated RAW264.7 cells (M2-like macrophages) were treated with PKH26-labeled MP<sub>S</sub><sub>AFP</sub>, Man-MP<sub>S</sub><sub>AFP</sub> or M2pep-MP<sub>S</sub><sub>AFP</sub> at the concentration of 10 µg protein mL<sup>-1</sup> for 4 h, and PKH26 MFI was determined by flow cytometry. Data are presented as means ± s.d. (n = 4 biological independent samples; one-way ANOVA followed by Tukey's HSD post-hoc test). Source data are provided as a Source Data file.

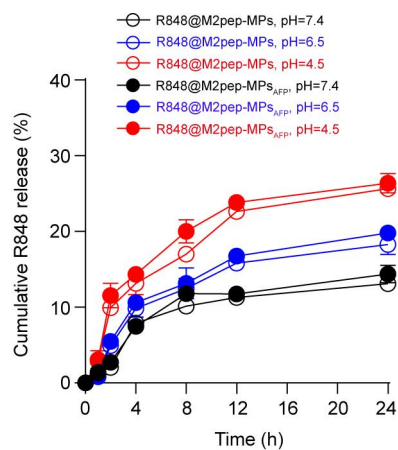

**Supplementary Fig. 7 In vitro pH-dependent drug release of R848@M2pep-MPs<sub>AFP</sub>.** R848@M2pep-MPs and R848@M2pep-MPs<sub>AFP</sub> were put in PBS at different pH values for different time intervals, and the released R848 content was determined by HPLC. Data are presented as means  $\pm$  s.d. (n = 3 independent samples). Source data are provided as a Source Data file.



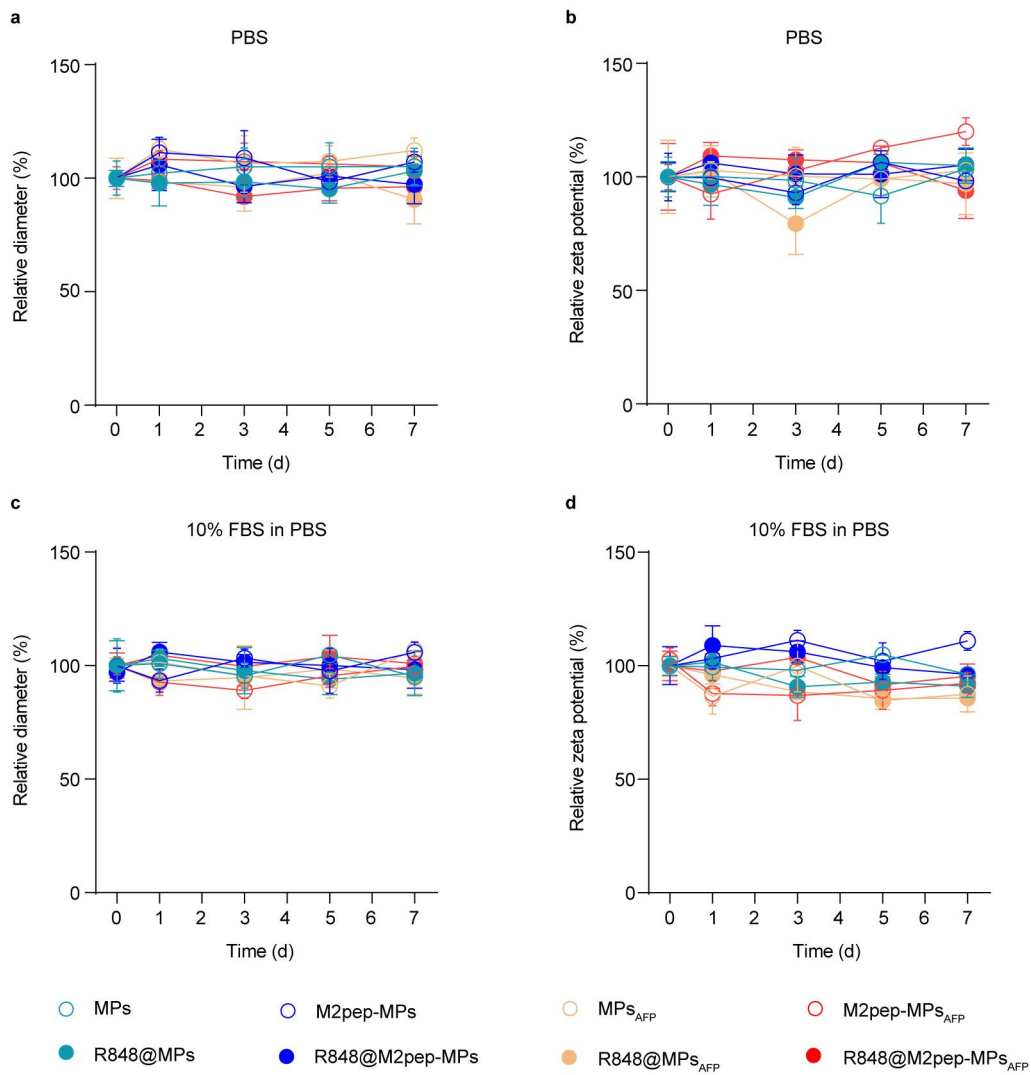

**Supplementary Fig. 8 Stability of R848@M2pep-MPs<sub>AFP</sub>.** (a,b) Relative diameter (a) and zeta potential (b) of MPs, M2pep-MPs, MP<sub>AFP</sub> and M2pep-MP<sub>AFP</sub> with or without R848 after incubation in PBS for different time intervals. Data are presented as means  $\pm$  s.d. (n = 3 independent samples). (c,d) Relative diameter (c) and zeta potential (d) of MPs, M2pep-MPs, MP<sub>AFP</sub> or M2pep-MP<sub>AFP</sub> with or without R848 after incubation in PBS containing 10% FBS for different time intervals. Data are presented as means  $\pm$  s.d. (n = 3 independent samples). Source data are provided as a Source Data file.

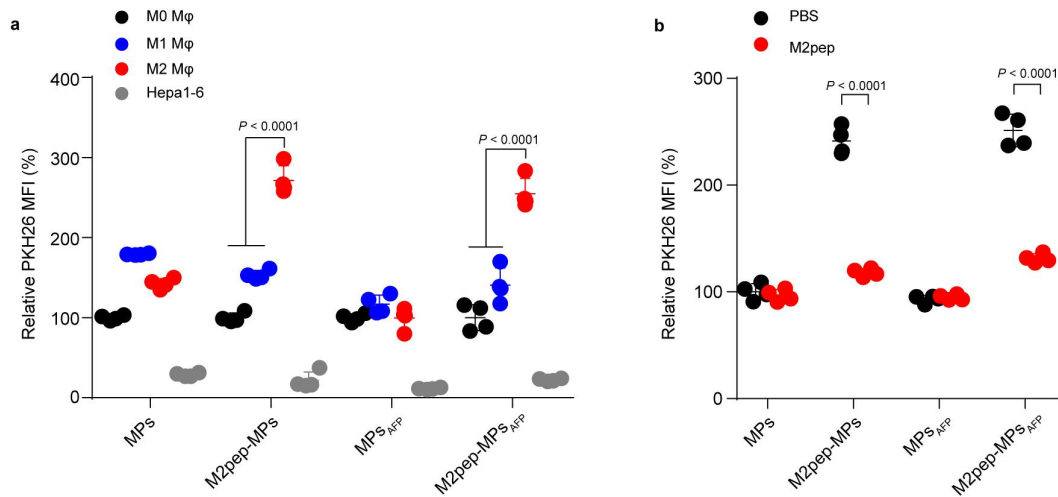

**Supplementary Fig. 9 M2-like macrophage-targeting capacity of M2pep-MPs<sub>AFP</sub>.**

(a) Relative PKH26 MFI in RAW264.7 cells (M0 macrophages), LPS- and IFN $\gamma$ -stimulated RAW264.7 cells (M1-like macrophages), IL-4-stimulated RAW264.7 cells (M2-like macrophages) and Hepa1-6 cells after treatment with PKH26-labeled MPs, M2pep-MPs, MP<sub>SAFP</sub> or M2pep-MP<sub>SAFP</sub> at the concentration of 10  $\mu\text{g}$  protein  $\text{mL}^{-1}$  for 4 h by flow cytometry. Data are presented as means  $\pm$  s.d. ( $n = 4$  biological independent samples; one-way ANOVA followed by Tukey's HSD post-hoc test). (b) Relative PKH26 MFI in M2-like macrophages after treatment with PKH26-labeled MPs, M2pep-MPs, MP<sub>SAFP</sub> or M2pep-MP<sub>SAFP</sub> at the concentration of 10  $\mu\text{g}$  protein  $\text{mL}^{-1}$  in the presence or absence of 5  $\mu\text{g}$   $\text{mL}^{-1}$  M2pep for 4 h. Data are presented as means  $\pm$  s.d. ( $n = 4$  biological independent samples; unpaired two-tailed Student's *t*-test). Source data are provided as a Source Data file.

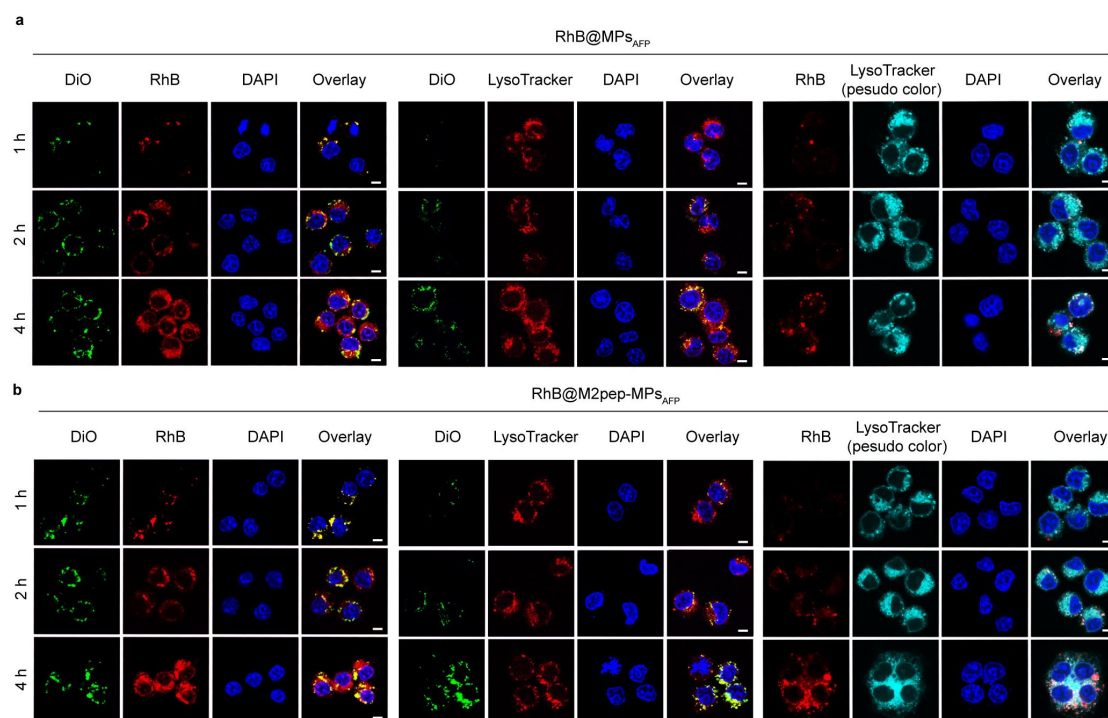

**Supplementary Fig. 10 Intracellular trafficking of RhB@MPs<sub>AFP</sub> and RhB@M2pep-MPs<sub>AFP</sub> in M2-like macrophages.** (a,b) Confocal microscopic images of M2-like macrophages after treatment with RhB-loaded DiO-labeled MP<sub>s</sub><sub>AFP</sub> (a) or M2pep-MP<sub>s</sub><sub>AFP</sub> (b) at the concentration of 10  $\mu\text{g protein mL}^{-1}$  for different time intervals and then labeling with 75 nM LysoTracker® Deep Red (lysosomes labeling dye) or 1  $\mu\text{g mL}^{-1}$  DAPI (nucleus labeling dye), respectively. Scale bars: 5  $\mu\text{m}$ . Images are representative of three independent samples.

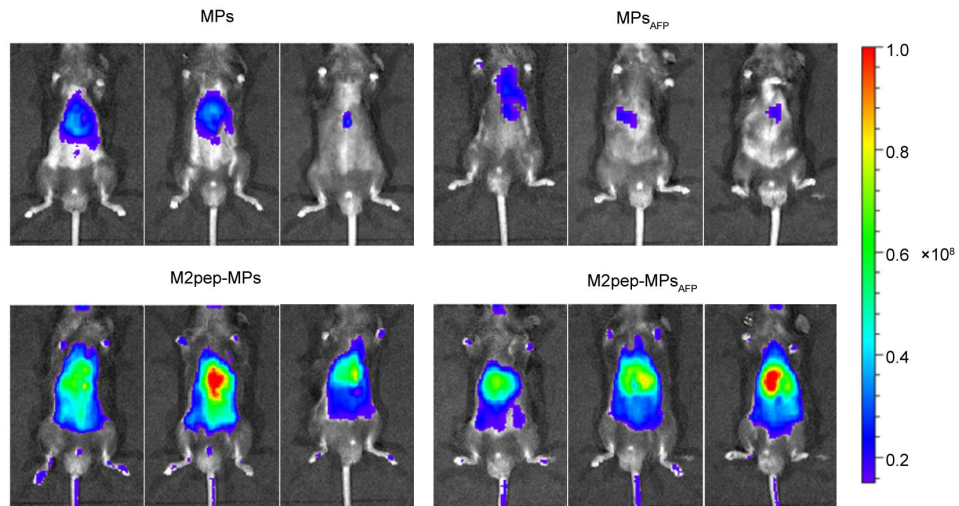

**Supplementary Fig. 11 In vivo biodistribution of M2pep-MPs<sub>AFP</sub>.** Hepa1-6 tumor-bearing mice were intravenously injected with IR780-labeled MPs, M2pep-MPs, MP<sub>sAFP</sub> or M2pep-MP<sub>sAFP</sub> at the dosage of 15 mg protein kg<sup>-1</sup>. At 24 h after injection, the in vivo imaging of mice was performed. (n = 3 mice per group).

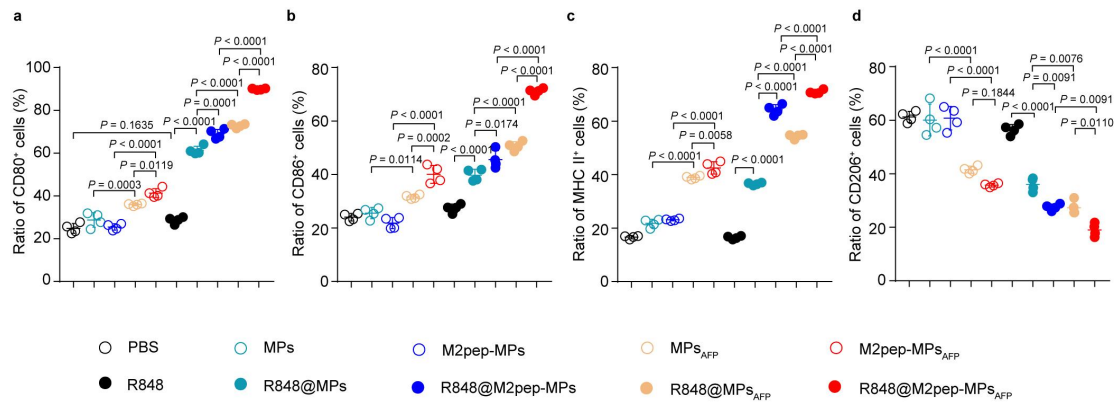

**Supplementary Fig. 12 Reprogramming M2-like macrophages into M1-like phenotype by R848@M2pep-MPs<sub>SAFP</sub>. (a-d) Ratios of CD80<sup>+</sup> (a), CD86<sup>+</sup> (b), MHC II<sup>+</sup> (c) and CD206<sup>+</sup> (d) cells in IL-4-stimulated RAW264.7 cells after treatment with PBS, MPs, M2pep-MPs, MP<sub>SAFP</sub>, M2pep-MPs<sub>SAFP</sub>, R848, R848@MPs, R848@M2pep-MPs, R848@MPs<sub>SAFP</sub> or R848@M2pep-MPs<sub>SAFP</sub> at the R848 concentration of 2 nM for 24 h by flow cytometry. Data are presented as means  $\pm$  s.d. (n = 4 biological independent samples; one-way ANOVA followed by Tukey's HSD post-hoc test). Source data are provided as a Source Data file.**

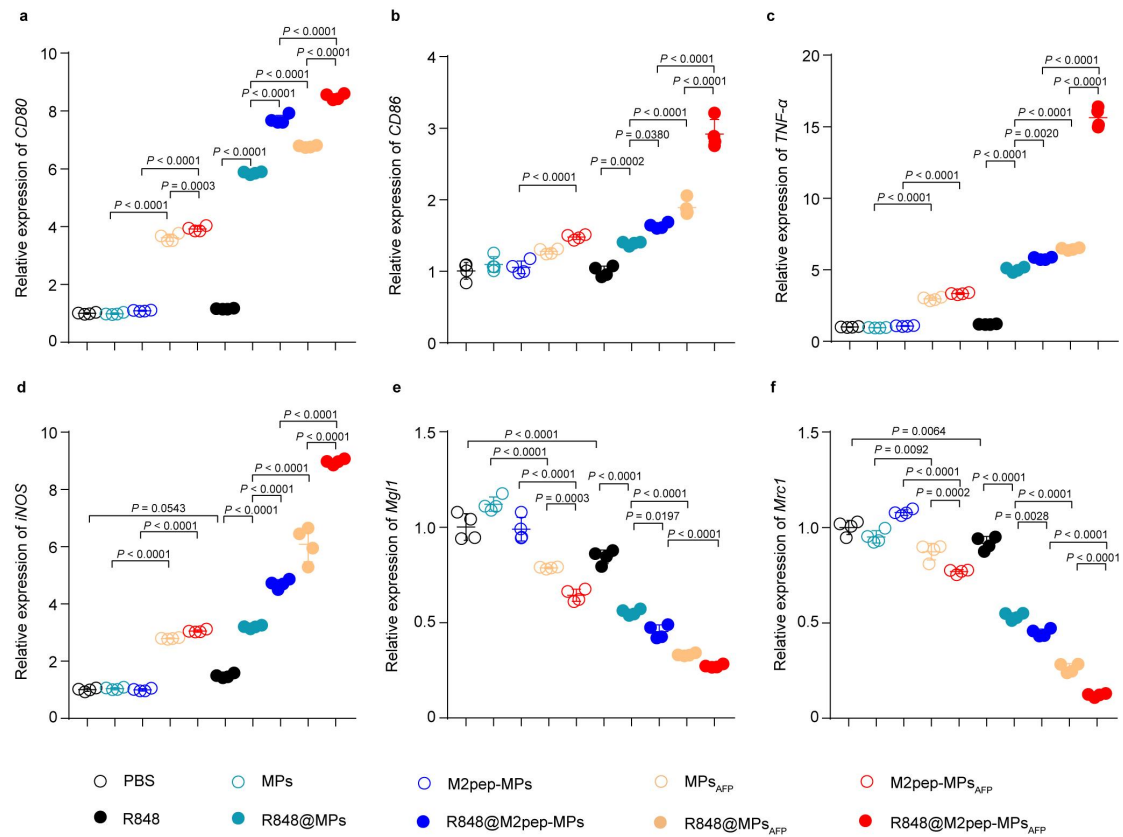

**Supplementary Fig. 13 Reprogramming of M2-like macrophages to M1-like phenotype by R848@M2pep-MPs<sub>SAFP</sub>.** (a-f) The mRNA expression levels of *CD80* (a), *CD86* (b), *TNF-α* (c), *iNOS* (d), *Mgl1* (e) and *Mrc1* (f) in IL-4-stimulated RAW264.7 cells after treatment with PBS, MPs, M2pep-MPs, MP<sub>SAFP</sub>, M2pep-MP<sub>SAFP</sub>, R848, R848@MPs, R848@M2pep-MPs, R848@MP<sub>SAFP</sub> or R848@M2pep-MP<sub>SAFP</sub> at the R848 concentration of 2 nM for 24 h by RT-qPCR. Data are presented as means ± s.d. (n = 4 biological independent samples; one-way ANOVA followed by Tukey's HSD post-hoc test). Source data are provided as a Source Data file.

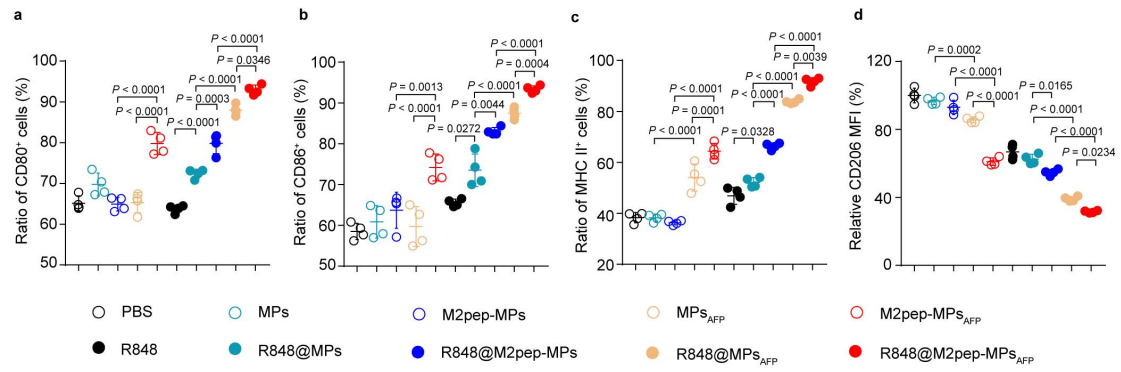

**Supplementary Fig. 14 Reprogramming of M2-like BMDMs to M1-like phenotype by R848@M2pep-MPs<sub>AFP</sub>.** (a-d) Percentage of CD80<sup>+</sup> (a), CD86<sup>+</sup> (b) and MHC II<sup>+</sup> (c) cells and relative CD206 MFI (d) in IL-4-stimulated BMDMs after treatment with PBS, MPs, M2pep-MPs, MP<sub>AFP</sub>, M2pep-MP<sub>AFP</sub>, R848, R848@MPs, R848@M2pep-MPs, R848@MP<sub>AFP</sub> or R848@M2pep-MP<sub>AFP</sub> derived from RAW264.7 or RAW264.7<sub>AFP</sub> cells at the R848 concentration of 2 nM for 24 h by flow cytometry. Data are presented as means  $\pm$  s.d. (n = 4 biological independent samples; one-way ANOVA followed by Tukey's HSD post-hoc test). Source data are provided as a Source Data file.

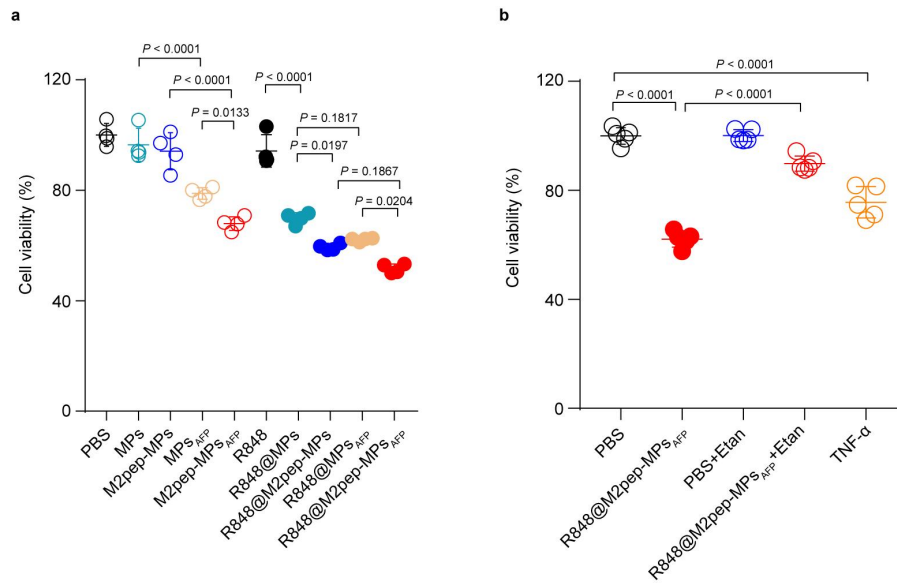

**Supplementary Fig. 15** **TNF- $\alpha$**  involved in the cytotoxicity of **R848@M2pep-MPs<sub>SAFP</sub>-reprogrammed M2-like macrophages against Hepa1-6 cells.** **(a)** Cell viability of Hepa1-6 cells at 24 h after incubation with the supernatants of IL-4-stimulated RAW264.7 cells pretreated with PBS, MPs, M2pep-MPs, MP<sub>SAFP</sub>, M2pep-MP<sub>SAFP</sub>, R848, R848@MPs, R848@M2pep-MPs, R848@MP<sub>SAFP</sub> or R848@M2pep-MP<sub>SAFP</sub> at the R848 concentration of 2 nM for 24 h by CCK-8 assay. Data are presented as means  $\pm$  s.d. ( $n = 4$  biological independent samples; one-way ANOVA followed by Tukey's HSD post-hoc test). **(b)** Cell viability of Hepa1-6 cells at 24 h after incubation with the supernatants of IL-4-stimulated RAW264.7 cells pretreated with PBS or R848@M2pep-MP<sub>SAFP</sub> at the R848 concentration of 2 nM for 24 h in the presence or absence of 0.5  $\mu\text{g mL}^{-1}$  Etan. TNF- $\alpha$  at 0.5  $\mu\text{g mL}^{-1}$  was used as a positive control. Data are presented as means  $\pm$  s.d. ( $n = 5$  biological independent samples; one-way ANOVA followed by Tukey's HSD post-hoc test). Source data are provided as a Source Data file.



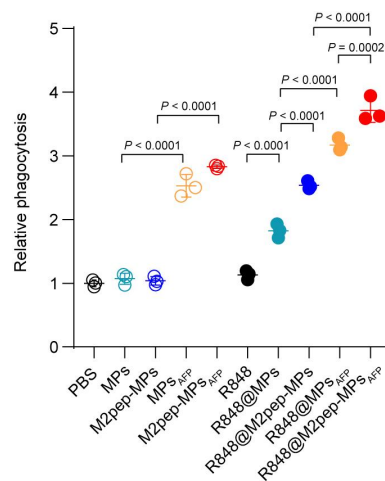

**Supplementary Fig. 16 Phagocytosis of Hepa1-6 cells by R848@M2pep-MPs<sub>AFP</sub>-reprogrammed M2-like macrophages.** IL-4-stimulated DiD-labeled RAW264.7 cells were treated with PBS, MPs, M2pep-MPs, MP<sub>sAFP</sub>, M2pep-MP<sub>sAFP</sub>, R848, R848@MPs, R848@M2pep-MPs, R848@MP<sub>sAFP</sub> or R848@M2pep-MP<sub>sAFP</sub> at the R848 concentration of 2 nM for 24 h, and then co-cultured with DiO-labeled Hepa1-6 cells at a ratio of 1:1 at 37 °C for 4 h. The phagocytosis of tumor cells by macrophages was determined by flow cytometry. Data are presented as means  $\pm$  s.d. (n = 3 biological independent samples; one-way ANOVA followed by Tukey's HSD post-hoc test). Source data are provided as a Source Data file.

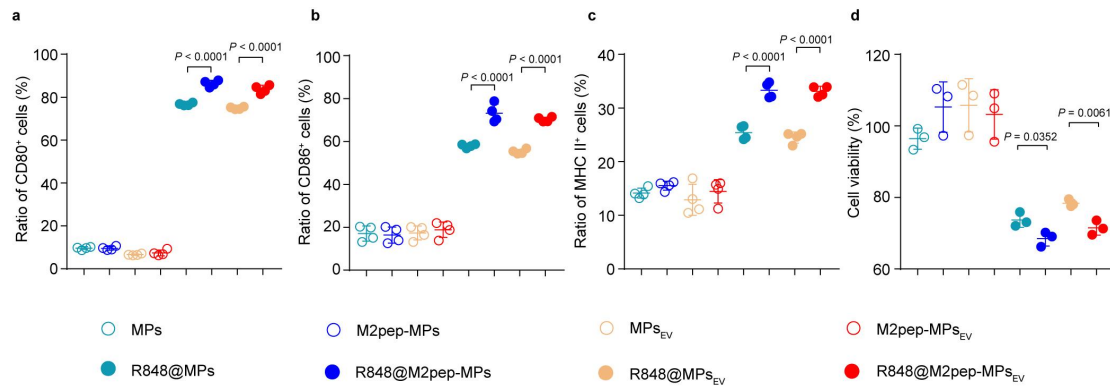

**Supplementary Fig. 17 Effects of lentivirus transfection on the reprogramming of M2-like macrophages by R848@M2pep-MPs<sub>AFP</sub>.** (a-c) Percentage of CD80<sup>+</sup> (a), CD86<sup>+</sup> (b) and MHC II<sup>+</sup> (c) cells in IL-4-stimulated RAW264.7 cells after treatment with MPs, M2pep-MPs, MP<sub>SEV</sub>, M2pep-MP<sub>SEV</sub>, R848@MPs, R848@M2pep-MPs, R848@MP<sub>SEV</sub> or R848@M2pep-MP<sub>SEV</sub> at the R848 concentration of 2 nM for 24 h by flow cytometry. Data are presented as means  $\pm$  s.d. (n = 4 biological independent samples; one-way ANOVA followed by Tukey's HSD post-hoc test). (d) Cell viability of Hepa1-6 cells at 24 h after treatment with the supernatants of IL-4-stimulated RAW264.7 cells pretreated with MPs, M2pep-MPs, MP<sub>SEV</sub>, M2pep-MP<sub>SEV</sub>, R848@MPs, R848@M2pep-MPs, R848@MP<sub>SEV</sub> or R848@M2pep-MP<sub>SEV</sub> at the R848 concentration of 2 nM for 24 h. Data are presented as means  $\pm$  s.d. (n = 3 biological independent samples; one-way ANOVA followed by Tukey's HSD post-hoc test). Source data are provided as a Source Data file.

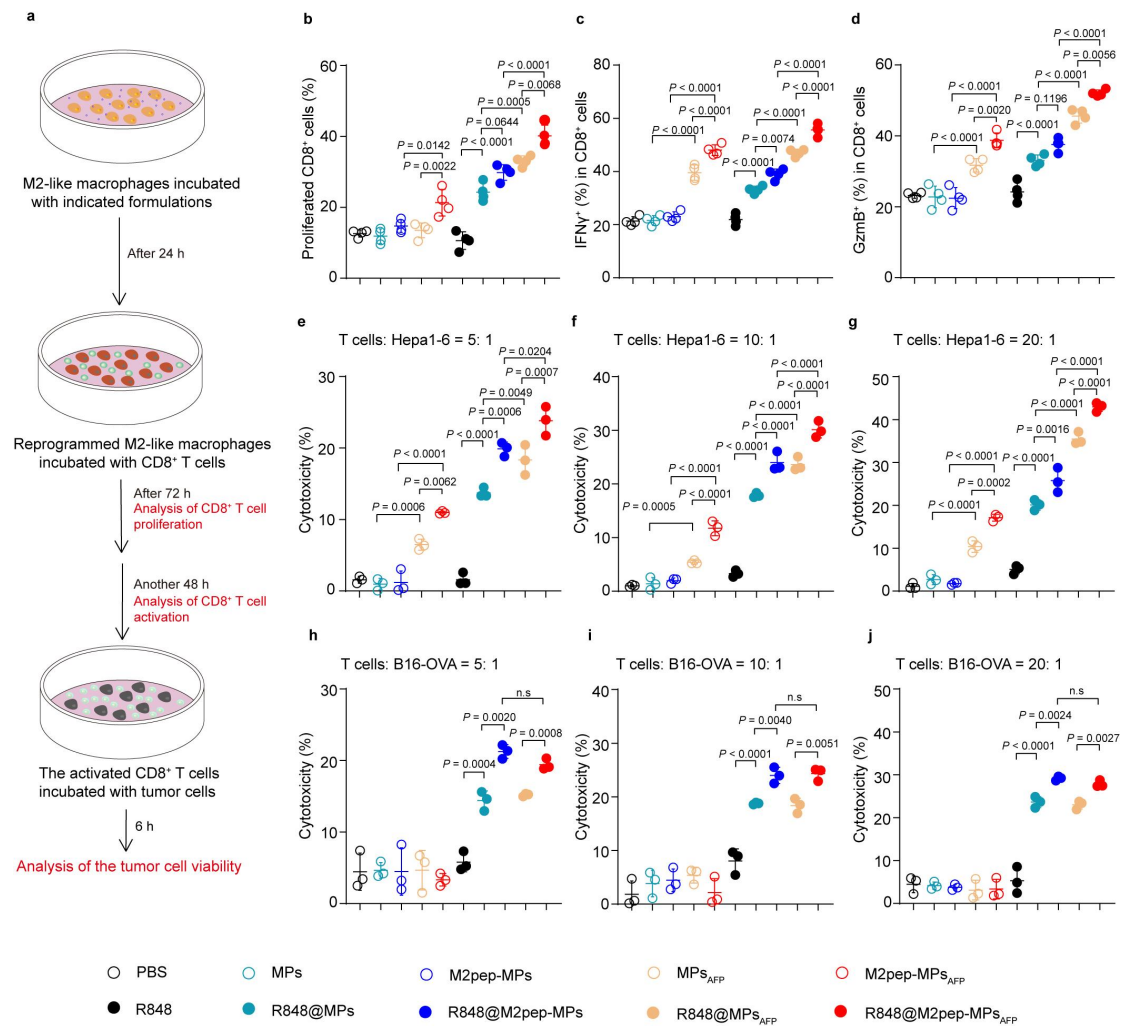

**Supplementary Fig. 18 Efficient activation of CD8<sup>+</sup> T cells by R848@M2pep-MPs<sub>AFP</sub>-reprogrammed M2-like macrophages.** (a) Schematic schedule for activating CD8<sup>+</sup> T cells by R848@M2pep-MPs<sub>AFP</sub>-reprogrammed M2-like macrophages. (b) Ratios of proliferated CD8<sup>+</sup> T cells indicated by CFSE dilution at 3 days after co-culture with the PBS-, MPs-, M2pep-MPs-, MP<sub>s</sub><sub>AFP</sub>-, M2pep-MP<sub>s</sub><sub>AFP</sub>-, R848-, R848@MPs-, R848@M2pep-MPs-, R848@MP<sub>s</sub><sub>AFP</sub>- or R848@M2pep-MP<sub>s</sub><sub>AFP</sub>-pretreated IL-4-stimulated RAW264.7 cells (R848 concentration at 2 nM for 24 h) as indicated in (a). Data are presented as means  $\pm$  s.d. (n = 4 biological independent samples; one-way ANOVA followed by Tukey's HSD post-hoc test). (c,d) Ratios of IFN $\gamma$ <sup>+</sup> (c) and GzmB<sup>+</sup> (d) cells in CD8<sup>+</sup> T cells at 5 days after co-culture with the above-treated IL-4-stimulated RAW264.7 cells as indicated

in **(a)**. Data are presented as means  $\pm$  s.d. ( $n = 4$  biological independent samples; one-way ANOVA followed by Tukey's HSD post-hoc test). **(e-j)** Cytotoxicity of CD8<sup>+</sup> T cells against Hepa1-6 or B16-OVA cells when the CD8<sup>+</sup> T cells (effector cells) co-cultured with the above-treated IL-4-stimulated RAW264.7 cells for 5 days were incubated with Hepa1-6 or B16-OVA cells (target cells) at the effector/target ratio of 5:1 **(e,h)**, 10:1 **(f,i)** and 20:1 **(g,j)** for 6 h as indicated in **(a)** by LDH assay. Data are presented as means  $\pm$  s.d. ( $n = 3$  biological independent samples; one-way ANOVA followed by Tukey's HSD post-hoc test). Source data are provided as a Source Data file.

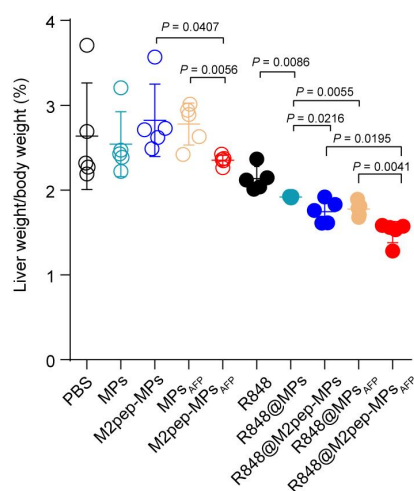

**Supplementary Fig. 19 Efficient inhibition in the ratio of liver to body weight after treatment with R848@M2pep-MPs<sub>AFP</sub> in orthotopic Hepa1-6 tumor-bearing mice.** Orthotopic Hepa1-6 tumor-bearing mice were intravenously injected with PBS, MPs, M2pep-MPs, MP<sub>SAFP</sub>, M2pep-MP<sub>SAFP</sub>, R848, R848@MPs, R848@M2pep-MPs, R848@MP<sub>SAFP</sub> or R848@M2pep-MP<sub>SAFP</sub> at the R848 dosage of 0.5 mg kg<sup>-1</sup> every three days for six times. At 16 days after intravenous injection, the ratio of liver to body weight was determined. Data are presented as means ± s.d. (n = 5 mice per group; one-way ANOVA followed by Tukey's HSD post-hoc test). Source data are provided as a Source Data file.

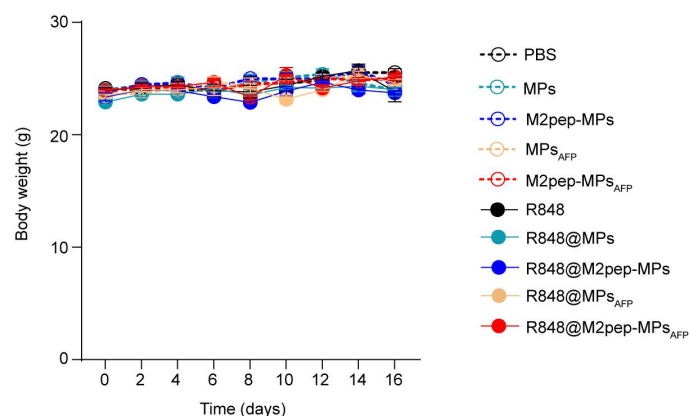

**Supplementary Fig. 20 Body weight of orthotopic Hepa1-6 tumor-bearing mice after treatment with R848@M2pep-MPs<sub>AFP</sub>.** Orthotopic Hepa1-6 tumor-bearing mice were intravenously injected with PBS, MPs, M2pep-MPs, MP<sub>s</sub><sub>AFP</sub>, M2pep-MP<sub>s</sub><sub>AFP</sub>, R848, R848@MPs, R848@M2pep-MPs, R848@MP<sub>s</sub><sub>AFP</sub> or R848@M2pep-MP<sub>s</sub><sub>AFP</sub> at the R848 dosage of 0.5 mg kg<sup>-1</sup> every three days for six times, and the body weight was measured every other day. Data are presented as means  $\pm$  s.d. (n = 5 mice per group). Source data are provided as a Source Data file.

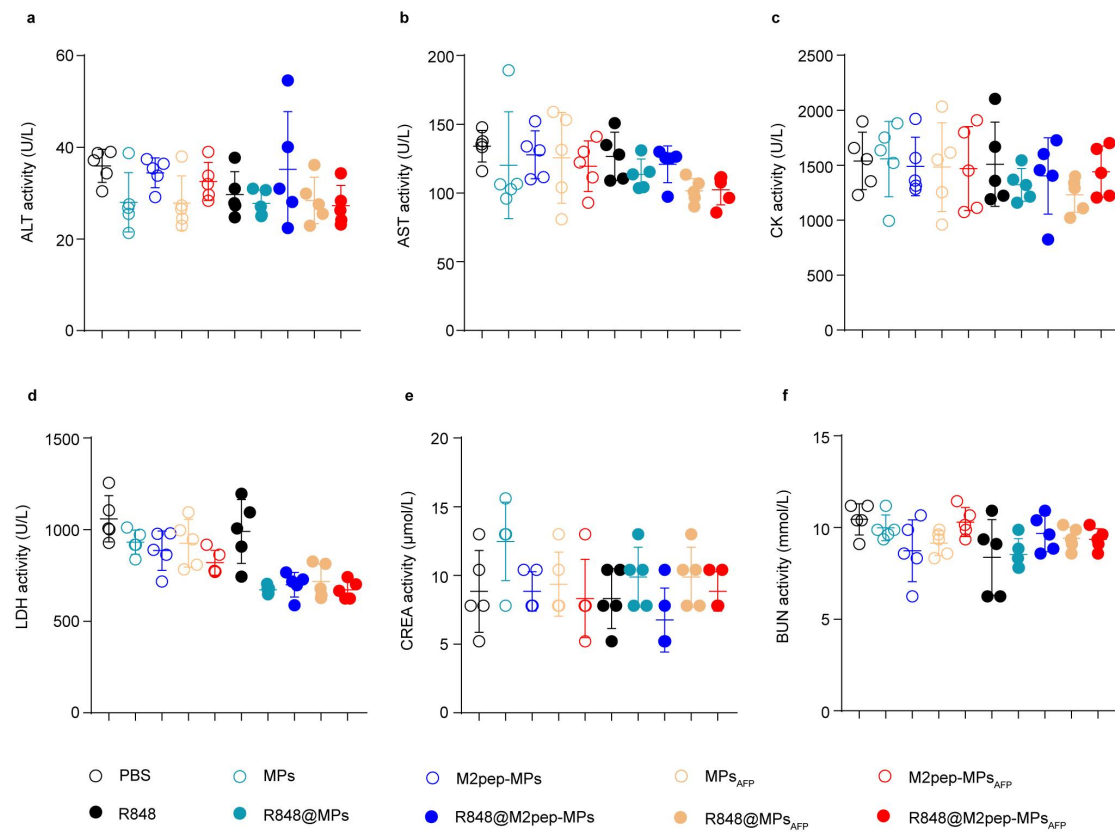

**Supplementary Fig. 21 Serological analysis of orthotopic Hepa1-6 tumor-bearing mice after treatment with R848@M2pep-MPs<sub>SAFP</sub>.** (a-e) The serological analysis of alanine aminotransferase (ALT, **a**), aspartate aminotransferase (AST, **b**), creatine kinase (CK, **c**), lactate dehydrogenase (LDH, **d**), creatinine (CREA, **e**) and blood urea nitrogen (BUN, **f**) in orthotopic Hepa1-6 tumor-bearing mice after intravenous injection of PBS, MPs, M2pep-MPs, MP<sub>SAFP</sub>, M2pep-MP<sub>SAFP</sub>, R848, R848@MPs, R848@M2pep-MPs, R848@MP<sub>SAFP</sub> or R848@M2pep-MP<sub>SAFP</sub> at the R848 dosage of 0.5 mg kg<sup>-1</sup> every three days for six times. Data are presented as means ± s.d. (n = 5 mice per group). Source data are provided as a Source Data file.

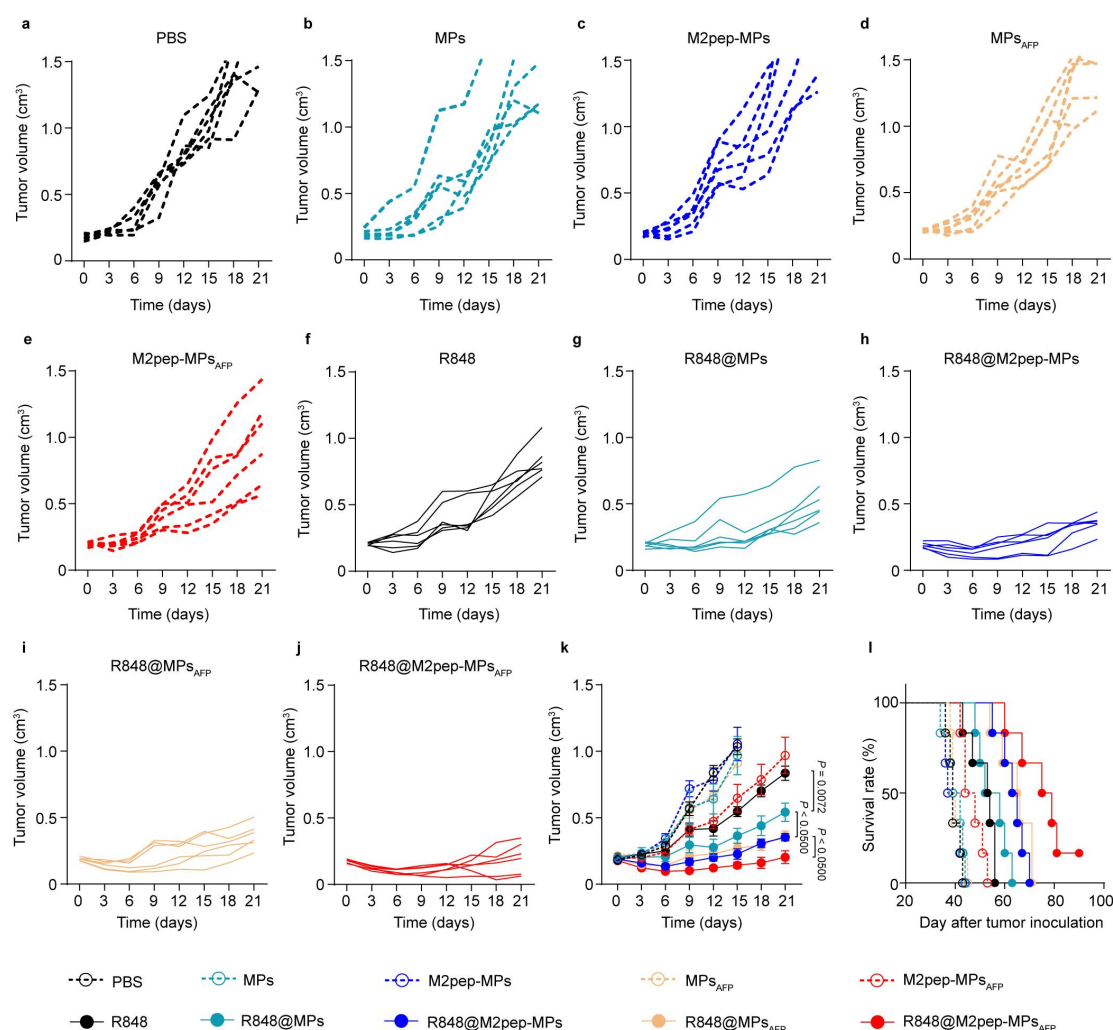

**Supplementary Fig. 22 Anticancer activity of R848@M2pep-MPs<sub>AFP</sub> in subcutaneous Hepa1-6 tumor-bearing mice.** (a-j) Individual tumor growth curves of subcutaneous Hepa1-6 tumor-bearing mice after intravenous injection of PBS (a), MPs (b), M2pep-MPs (c), MPs<sub>AFP</sub> (d), M2pep-MPs<sub>AFP</sub> (e), R848 (f), R848@MPs (g), R848@M2pep-MPs (h), R848@MPs<sub>AFP</sub> (i) or R848@M2pep-MPs<sub>AFP</sub> (j) at the R848 dosage of 0.5 mg kg<sup>-1</sup> every three days for six times. (k) Average tumor growth curves of subcutaneous Hepa1-6 tumor-bearing mice after treatment as above. Data are presented as means  $\pm$  s.e.m. (n = 6 mice per group; one-way ANOVA followed by Tukey's HSD post-hoc test). (l) Kaplan-Meier survival plot of subcutaneous Hepa1-6 tumor-bearing mice after treatment as above. (n = 6 mice per group). Source data are provided as a Source Data file.



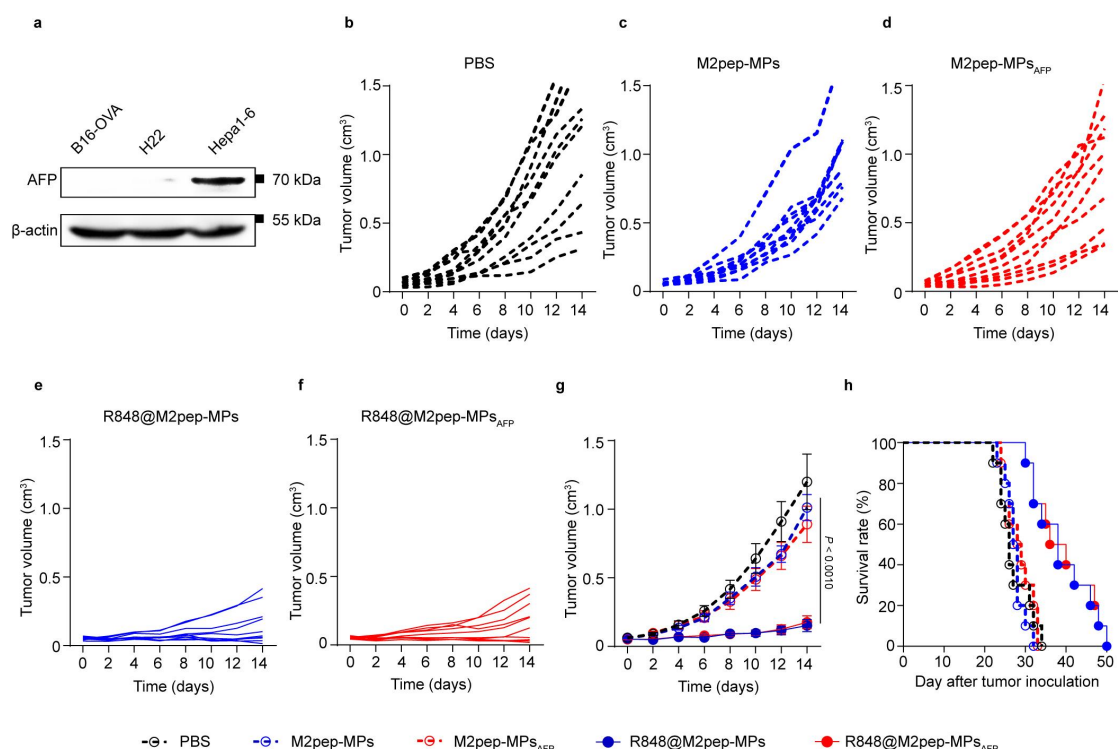

**Supplementary Fig. 23 Anticancer activity of R848@M2pep-MPs<sub>AFP</sub> in subcutaneous H22 tumor-bearing mice.** (a) AFP expression in B16-OVA, H22 and Hepa1-6 cells by western blotting. Images are representative of three independent samples. (b-f) Individual tumor growth curves of H22 tumor-bearing mice after intravenous injection of PBS (b), M2pep-MPs (c), M2pep-MPs<sub>AFP</sub> (d), R848@M2pep-MPs (e) or R848@M2pep-MPs<sub>AFP</sub> (f) every three days for six times at the R848 dosage of 0.5 mg kg<sup>-1</sup>. (g) Average tumor growth curves of H22 tumor-bearing mice after treatment as above. Data are presented as means  $\pm$  s.e.m. (n = 10 mice per group; one-way ANOVA followed by Tukey's HSD post-hoc test). (h) Kaplan-Meier survival plot of H22 tumor-bearing mice after treatment as above. (n = 10 mice per group). Source data are provided as a Source Data file.

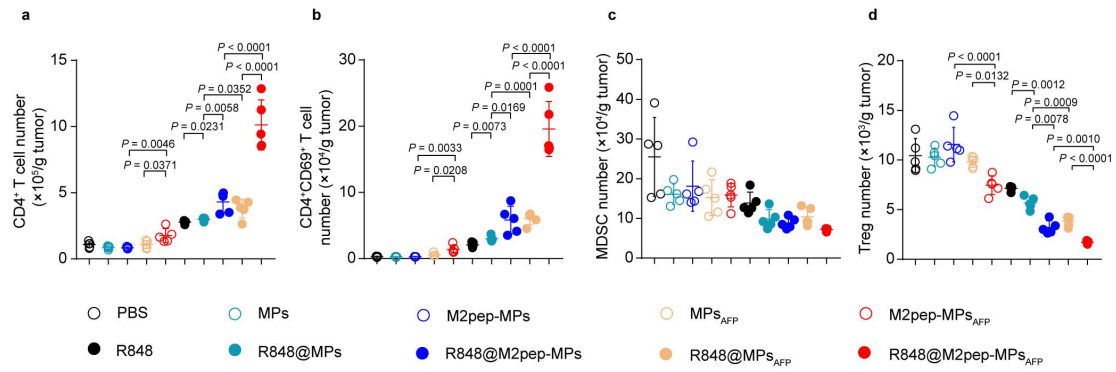

**Supplementary Fig. 24 Improved tumor immune microenvironment by R848@M2pep-MP<sub>AFP</sub> in orthotopic Hepa1-6 tumor-bearing mice.** (a-d) The numbers of CD4<sup>+</sup> T cells (a), CD4<sup>+</sup>CD69<sup>+</sup> T cells (b), MDSCs (c) and Tregs (d) in tumor tissues of orthotopic Hepa1-6 tumor-bearing mice at 16 days after intravenous injection of PBS, MPs, M2pep-MPs, MP<sub>AFP</sub>, M2pep-MP<sub>AFP</sub>, R848, R848@MPs, R848@M2pep-MPs, R848@MP<sub>AFP</sub> or R848@M2pep-MP<sub>AFP</sub> at the R848 dosage of 0.5 mg kg<sup>-1</sup> every three days for six times. Data are presented as means ± s.d. (n = 5 mice per group; one-way ANOVA followed by Tukey's HSD post-hoc test). Source data are provided as a Source Data file.

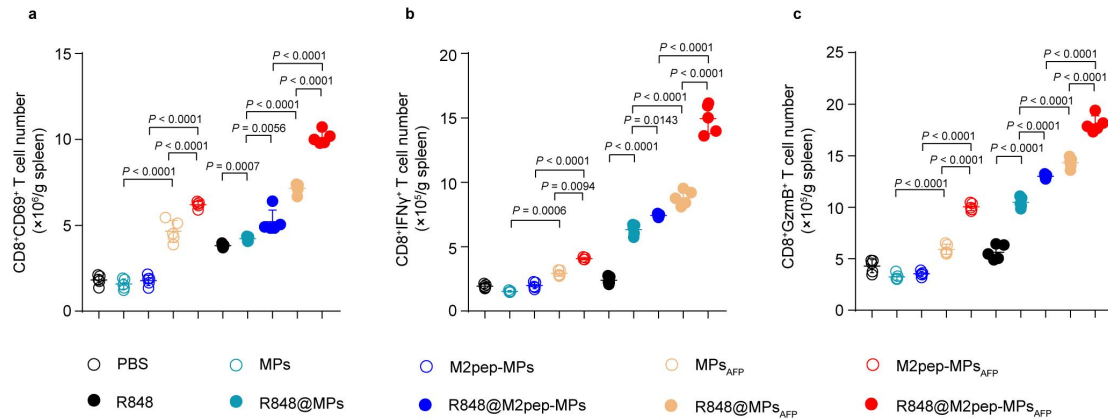

**Supplementary Fig. 25 Improved systemic antitumor immunity by R848@M2pep-MPs<sub>SAFP</sub> in orthotopic Hepa1-6 tumor-bearing mice. (a-c)** The numbers of CD8<sup>+</sup>CD69<sup>+</sup> T (a), CD8<sup>+</sup>IFN $\gamma$ <sup>+</sup> T (b), and CD8<sup>+</sup>GzmB<sup>+</sup> T (c) cells in spleens of orthotopic Hepa1-6 tumor-bearing mice at 16 days after intravenous injection of PBS, MPs, M2pep-MPs, MP<sub>SAFP</sub>, M2pep-MP<sub>SAFP</sub>, R848, R848@MPs, R848@M2pep-MPs, R848@MP<sub>SAFP</sub> or R848@M2pep-MP<sub>SAFP</sub> at the R848 dosage of 0.5 mg kg<sup>-1</sup> every three days for six times. Data are presented as means  $\pm$  s.d. (n = 5 mice per group; one-way ANOVA followed by Tukey's HSD post-hoc test). Source data are provided as a Source Data file.

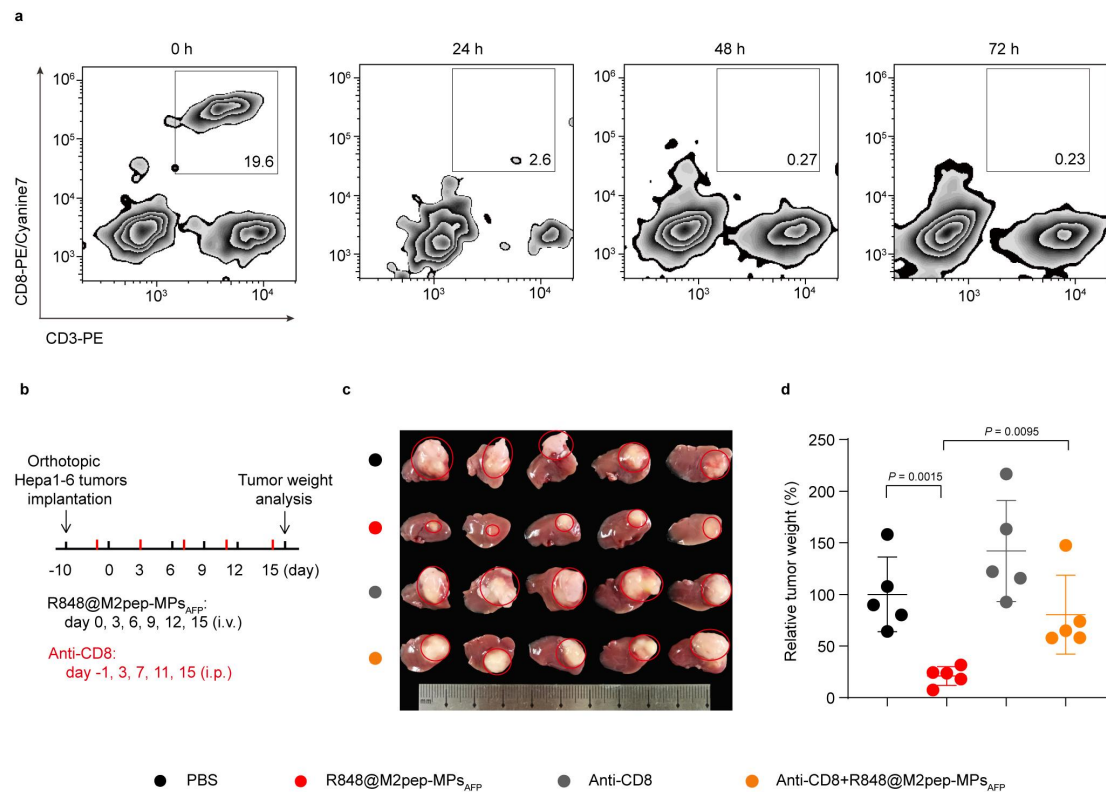

**Supplementary Fig. 26 CD8<sup>+</sup> T cell-involved in R848@M2pep-MPs<sub>AFP</sub>-induced anticancer effects in orthotopic Hepa1-6 tumor-bearing mice. (a)** Percentages of CD3<sup>+</sup>CD8<sup>+</sup> T cells in peripheral blood of orthotopic Hepa1-6 tumor-bearing mice at different time intervals after intraperitoneal injection of anti-CD8 antibody at the dosage of 100  $\mu$ g per mice once. Images are representative of five independent samples. **(b)** Schematic schedule for the anticancer experiments in orthotopic Hepa1-6 tumor-bearing mice after CD8<sup>+</sup> T cell depletion. **(c,d)** Tumor images **(c)** and tumor weight **(d)** of orthotopic Hepa1-6 tumor-bearing mice after intravenous injection of R848@M2pep-MPs<sub>AFP</sub> at the R848 dosage of 0.5 mg kg<sup>-1</sup> every three days for 6 times in the presence or absence of intraperitoneal injection of anti-CD8 antibody at the dosage of 100  $\mu$ g per mice every four days for 5 times as indicated in **(b)**. Data are presented as means  $\pm$  s.d. (n = 5 mice per group; one-way ANOVA followed by Tukey's HSD post-hoc test). Source data are provided as a Source Data file.

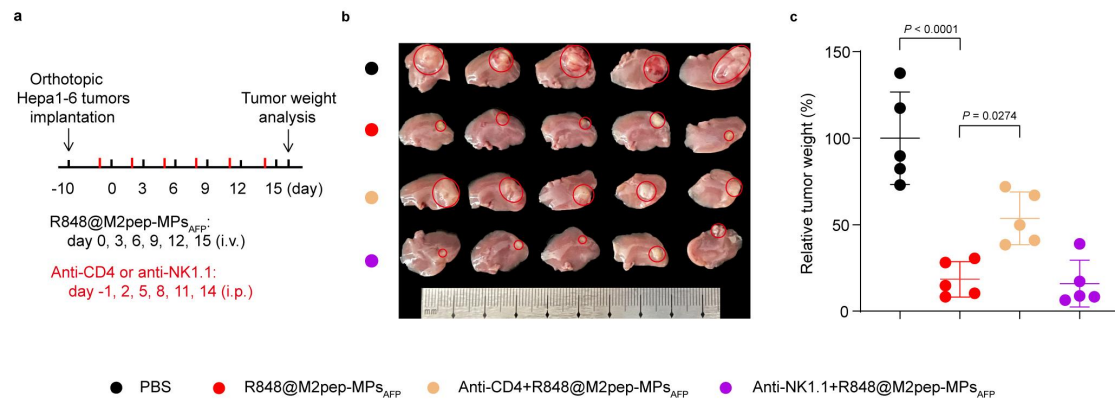

**Supplementary Fig. 27 CD4<sup>+</sup> T cell-involved in R848@M2pep-MPs<sub>AFP</sub>-induced anticancer effects in orthotopic Hepa1-6 tumor-bearing mice.** (a) Schematic schedule for the anticancer experiments in orthotopic Hepa1-6 tumor-bearing mice after CD4<sup>+</sup> T or NK cell depletion. (b,c) Tumor images (b) and tumor weight (c) in orthotopic Hepa1-6 tumor-bearing mice after intravenous injection of R848@M2pep-MPs<sub>AFP</sub> at the R848 dosage of 0.5 mg kg<sup>-1</sup> every three days for 6 times in the presence or absence of intraperitoneal injection of anti-CD4 or anti-NK1.1 antibody at the dosage of 100 µg per mice every three days for 6 times as indicated in (a). Data are presented as means ± s.d. (n = 5 mice per group; one-way ANOVA followed by Tukey's HSD post-hoc test). Source data are provided as a Source Data file.

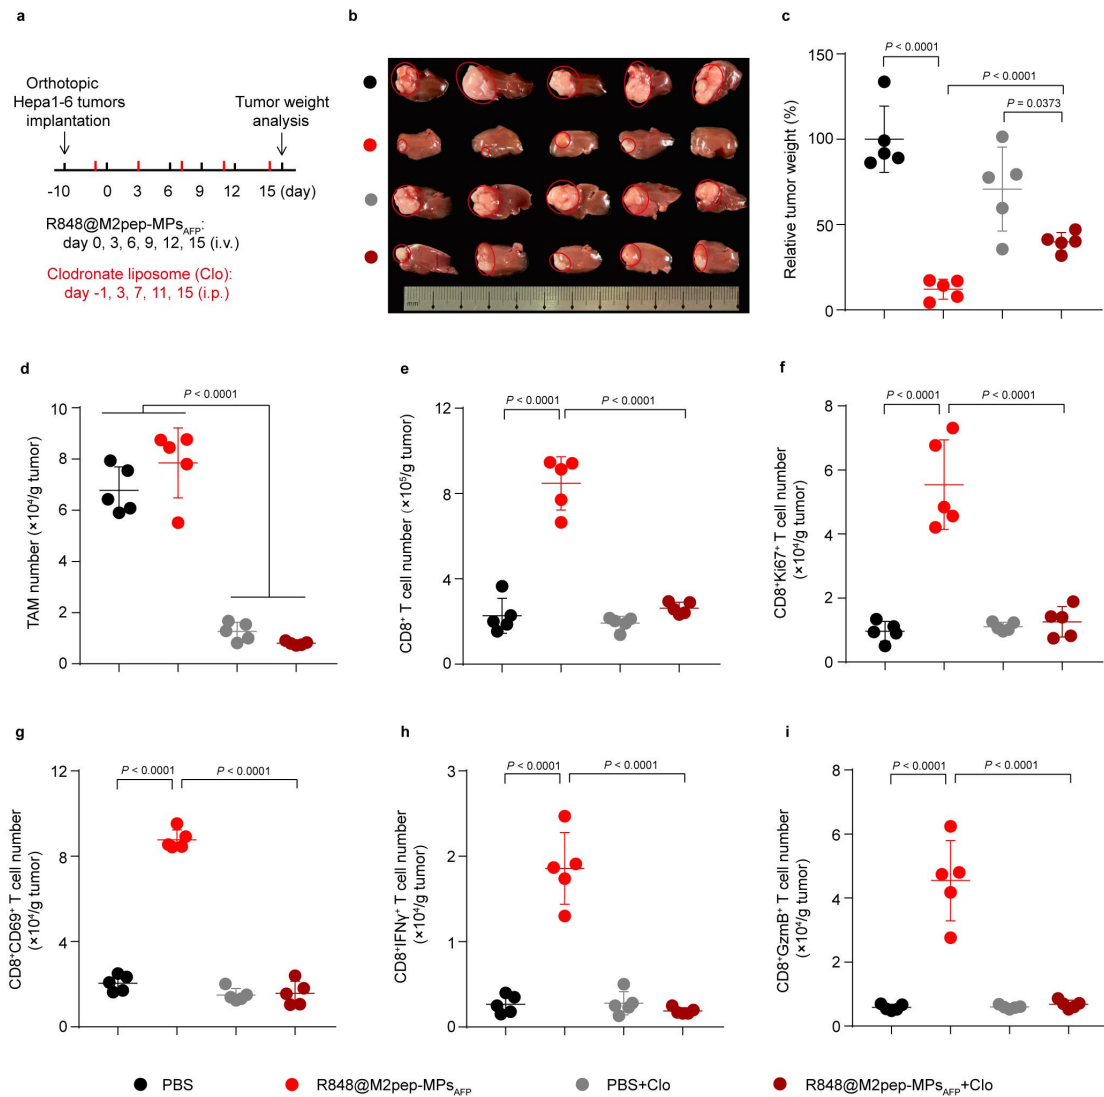

**Supplementary Fig. 28 Macrophage-involved in R848@M2pep-MPs<sub>AFP</sub>-induced anticancer effects and antitumor immunity in orthotopic Hepa1-6 tumor-bearing mice.** (a) Schematic schedule for the anticancer experiments in orthotopic Hepa1-6 tumor-bearing mice after macrophage depletion. (b,c) Tumor images (b) and tumor weight (c) of orthotopic Hepa1-6 tumor-bearing mice after intravenous injection of R848@M2pep-MPs<sub>AFP</sub> at the R848 dosage of 0.5 mg kg<sup>-1</sup> every three days for 6 times in the presence or absence of intraperitoneal injection of clodronate liposomes (Clo) at the dosage of 3.75 mg kg<sup>-1</sup> every four days for 5 times as indicated in (a). Data are

presented as means  $\pm$  s.d. for (c) (n = 5 mice per group; one-way ANOVA followed by Tukey's HSD post-hoc test). (d-i) The numbers of TAMs (d), CD8<sup>+</sup> T cells (e), CD8<sup>+</sup>Ki67<sup>+</sup> T cells (f), CD8<sup>+</sup>CD69<sup>+</sup> T cells (g), CD8<sup>+</sup>IFN $\gamma$ <sup>+</sup> T cells (h) and CD8<sup>+</sup>GzmB<sup>+</sup> T cells (i) in tumor tissues of orthotopic Hepa1-6 tumor-bearing mice after treatment as indicated in (a). Data are presented as means  $\pm$  s.d. (n = 5 mice per group; one-way ANOVA followed by Tukey's HSD post-hoc test). Source data are provided as a Source Data file.

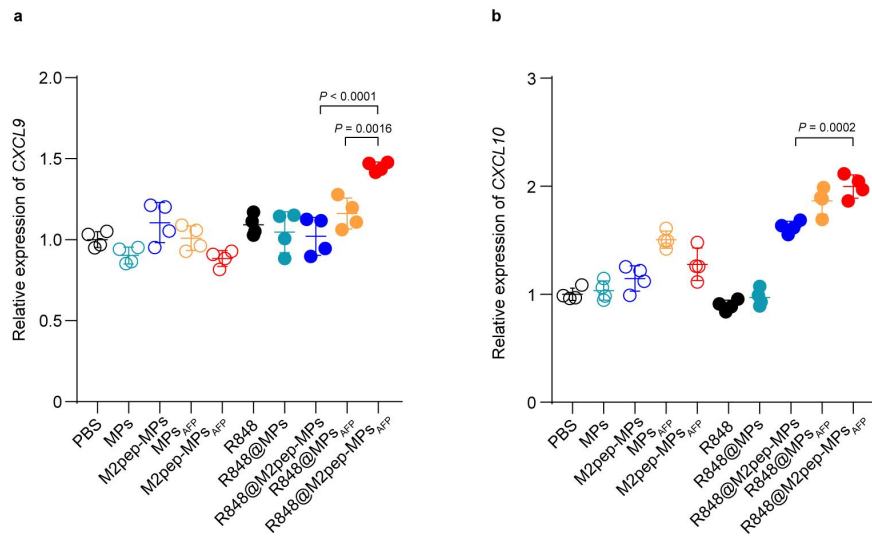

**Supplementary Fig. 29 CXCL9 and CXCL10 expression in R848@M2pep-MPs<sub>SAFP</sub>-reprogrammed M2-like RAW264.7.** (a,b) The mRNA expression levels of *CXCL9* (a) and *CXCL10* (b) in IL-4-stimulated RAW264.7 cells after treatment with PBS, MPs, M2pep-MPs, MP<sub>SAFP</sub>, M2pep-MP<sub>SAFP</sub>, R848, R848@MPs, R848@M2pep-MPs, R848@MP<sub>SAFP</sub> or R848@M2pep-MP<sub>SAFP</sub> at the R848 concentration of 2 nM for 24 h by RT-qPCR. Data are presented as means  $\pm$  s.d. (n = 4 biological independent samples; one-way ANOVA followed by Tukey's HSD post-hoc test). Source data are provided as a Source Data file.



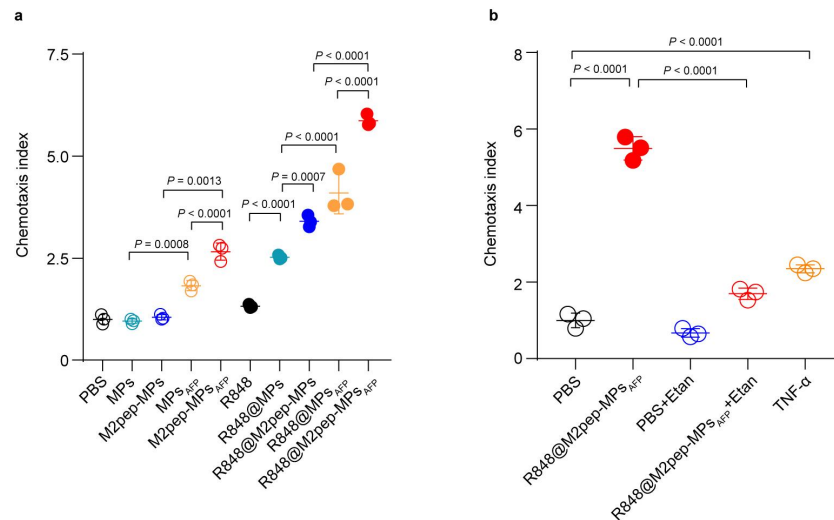

**Supplementary Fig. 30** **TNF- $\alpha$ -involved in the recruitment of CD8<sup>+</sup> T cells by R848@M2pep-MPs<sub>AFP</sub>-reprogrammed macrophages.** **(a)** Chemotaxis index of T lymphocytes seeded in the top chambers at 6 h after co-culture with the supernatants of IL-4-stimulated RAW264.7 cells pretreated with PBS, MPs, M2pep-MPs, MPs<sub>AFP</sub>, M2pep-MPs<sub>AFP</sub>, R848, R848@MPs, R848@M2pep-MPs, R848@MPs<sub>AFP</sub> or R848@M2pep-MPs<sub>AFP</sub> at the R848 concentration of 2 nM for 24 h in the bottom chambers. Data are presented as means  $\pm$  s.d. ( $n = 3$  biological independent samples; one-way ANOVA followed by Tukey's HSD post-hoc test). **(b)** Chemotaxis index of T lymphocytes seeded in the top chambers at 6 h after co-culture with the supernatants of IL-4-stimulated RAW264.7 cells pretreated with PBS or R848@M2pep-MPs<sub>AFP</sub> at the R848 concentration of 2 nM for 24 h in the presence or absence of Etan at concentration of 0.5  $\mu\text{g mL}^{-1}$  in the bottom chambers by flow cytometry. Data are presented as means  $\pm$  s.d. ( $n = 3$  biological independent samples; one-way ANOVA followed by Tukey's HSD post-hoc test). Source data are provided as a Source Data file.

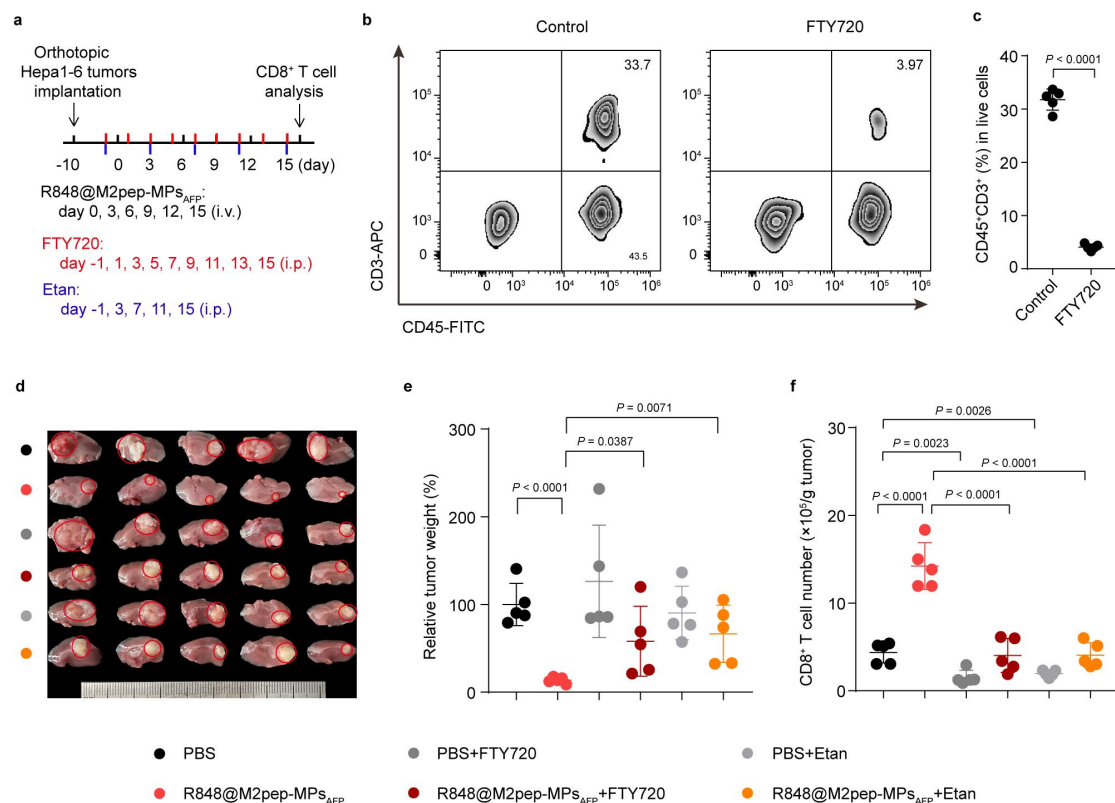

**Supplementary Fig. 31 R848@M2pep-MPs<sub>AFP</sub>-induced CD8<sup>+</sup> T cell recruitment in orthotopic Hepa1-6 tumor-bearing mice.** (a) Schematic schedule for R848@M2pep-MPs<sub>AFP</sub>-induced CD8<sup>+</sup> T cell recruitment experiment in orthotopic Hepa1-6 tumor-bearing mice. (b,c) Representative flow cytometric plots (b) and the percentages of CD45<sup>+</sup>CD3<sup>+</sup> T cells in peripheral blood (c) of orthotopic Hepa1-6 tumor-bearing mice at 24 h after intraperitoneal injection of FTY720. Data are presented as means  $\pm$  s.d. (n = 5 mice per group; unpaired two-tailed Student's *t*-test). (d-f) Tumor images (d), tumor weight (e) and CD8<sup>+</sup> T cell numbers in tumor tissues (f) of orthotopic Hepa1-6 tumor-bearing mice after intravenous injection of PBS or R848@M2pep-MPs<sub>AFP</sub> at the R848 dosage of 0.5 mg kg<sup>-1</sup> every three days for 6 times in the presence or absence of intraperitoneal injection of FTY720 (1 mg kg<sup>-1</sup>) or Etan (5 mg kg<sup>-1</sup>) as indicated in (a). Data are presented as means  $\pm$  s.d. (n = 5 mice per group; one-way ANOVA followed by Tukey's HSD post-hoc test). Source data are provided as a Source Data file.

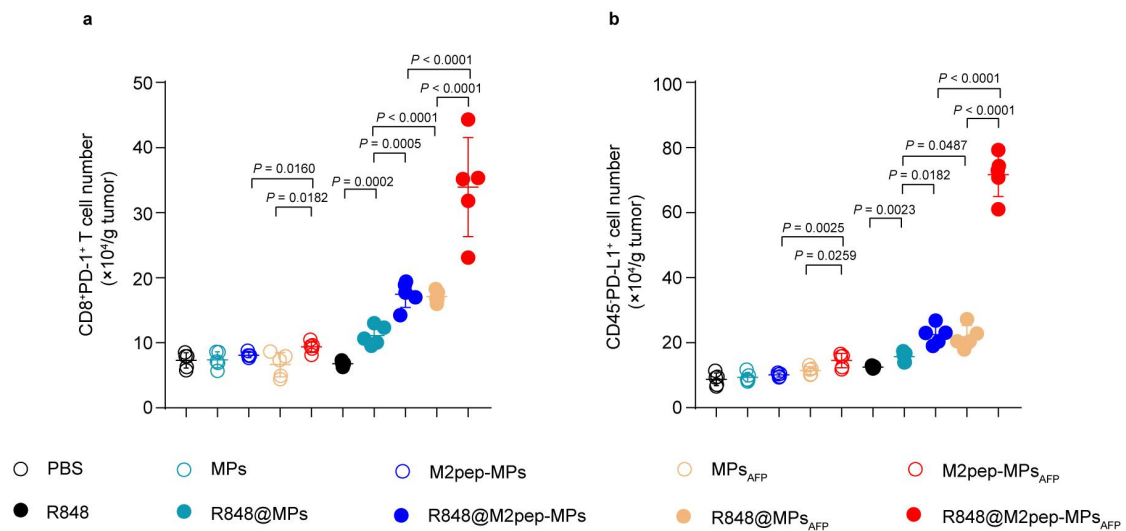

**Supplementary Fig. 32 Enhanced expression of PD-1 and PD-L1 by R848@M2pep-MPs<sub>AFP</sub> in tumors tissues of orthotopic Hepa1-6 tumor-bearing mice. (a,b)** The numbers of CD8<sup>+</sup>PD-1<sup>+</sup> T cells (a) and CD45<sup>+</sup>PD-L1<sup>+</sup> tumor cells (b) in tumor tissues of orthotopic Hepa1-6 tumor-bearing mice after intravenous injection of PBS, MPs, M2pep-MPs, MPs<sub>AFP</sub>, M2pep-MPs<sub>AFP</sub>, R848, R848@MPs, R848@M2pep-MPs, R848@MPs<sub>AFP</sub> or R848@M2pep-MPs<sub>AFP</sub> at the R848 dosage of 0.5 mg kg<sup>-1</sup> every three days for six times. Data are presented as means ± s.d. (n = 5 mice per group; one-way ANOVA followed by Tukey's HSD post-hoc test). Source data are provided as a Source Data file.

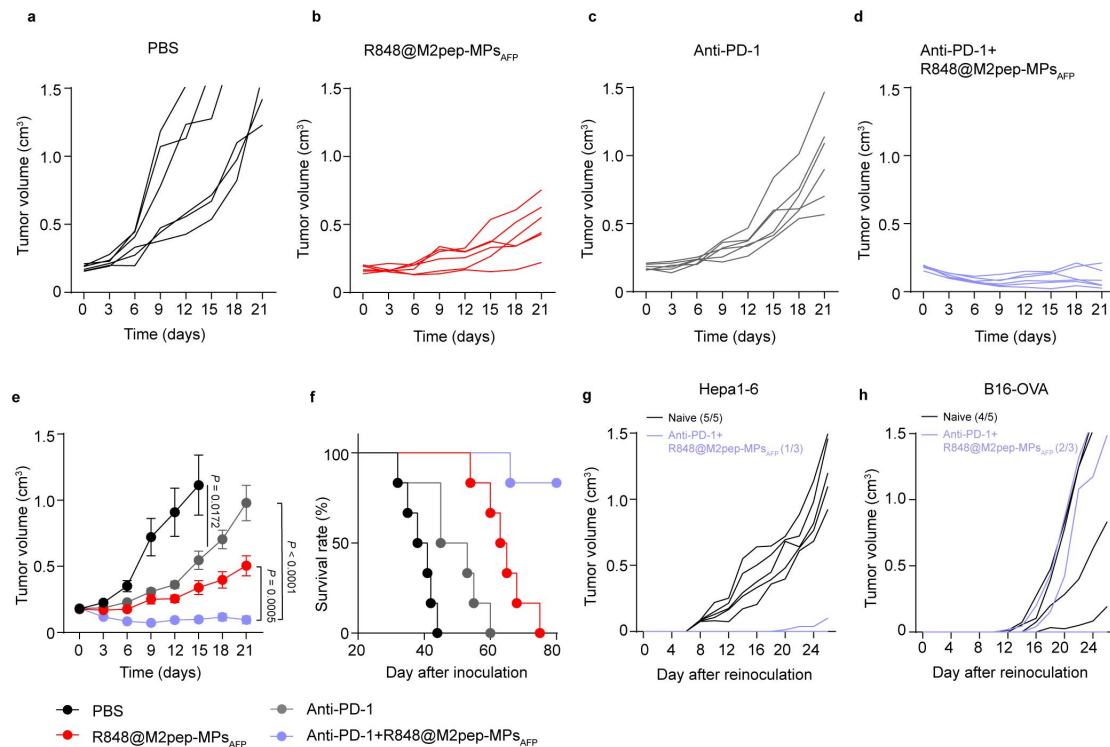

**Supplementary Fig. 33 Potent anticancer activity of combination of anti-PD-1 antibody and R848@M2pep-MPs<sub>AFP</sub> in subcutaneous Hepa1-6 tumor-bearing mice.** (a-d) Individual tumor growth curves of subcutaneous Hepa1-6 tumor-bearing mice after treatment with PBS (a), R848@M2pep-MPs<sub>AFP</sub> (b), anti-PD-1 antibody (c) or the combination of R848@M2pep-MPs<sub>AFP</sub> and anti-PD-1 antibody (d) at the anti-PD-1 antibody dosage of 5 mg kg<sup>-1</sup> and R848 dosage of 0.5 mg kg<sup>-1</sup> indicated in Fig. 6a. (e) Average tumor growth curves of subcutaneous Hepa1-6 tumor-bearing mice after treatment as above. Data are presented as means  $\pm$  s.e.m. (n = 6 mice per group; one-way ANOVA followed by Tukey's HSD post-hoc test). (f) Kaplan-Meier survival plot of subcutaneous Hepa1-6 tumor-bearing mice after treatment as above. (n = 6 mice per group). (g,h) Individual tumor growth curves after rechallenge with Hepa1-6 cells (3  $\times$  10<sup>6</sup> cells, g) and B16-OVA cells (1  $\times$  10<sup>6</sup> cells, h) in naïve mice (n = 5 mice) or combination of anti-PD-1 antibody and R848@M2pep-MPs<sub>AFP</sub>-cured mice (n = 3 mice). Source data are provided as a Source Data file.

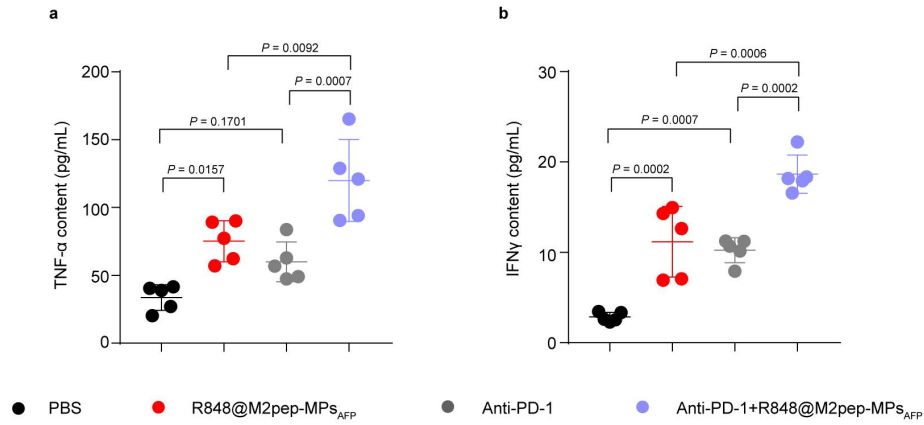

**Supplementary Fig. 34 Cytokine contents in serum of orthotopic Hepa1-6 tumor-bearing mice after treatment with R848@M2pep-MPs<sub>AFP</sub> and anti-PD-1 antibody. (a,b)** The contents of TNF- $\alpha$  (a) and IFN $\gamma$  (b) in serum of orthotopic Hepa1-6 tumor-bearing mice after treatment with PBS, R848@M2pep-MPs<sub>AFP</sub>, anti-PD-1 antibody or a combination of R848@M2pep-MPs<sub>AFP</sub> and anti-PD-1 antibody at the anti-PD-1 antibody dosage of 5 mg kg<sup>-1</sup> and R848 dosage of 0.5 mg kg<sup>-1</sup> indicated in Fig. 6a. Data are presented as means  $\pm$  s.d. (n = 5 mice per group; one-way ANOVA followed by Tukey's HSD post-hoc test). Source data are provided as a Source Data file.

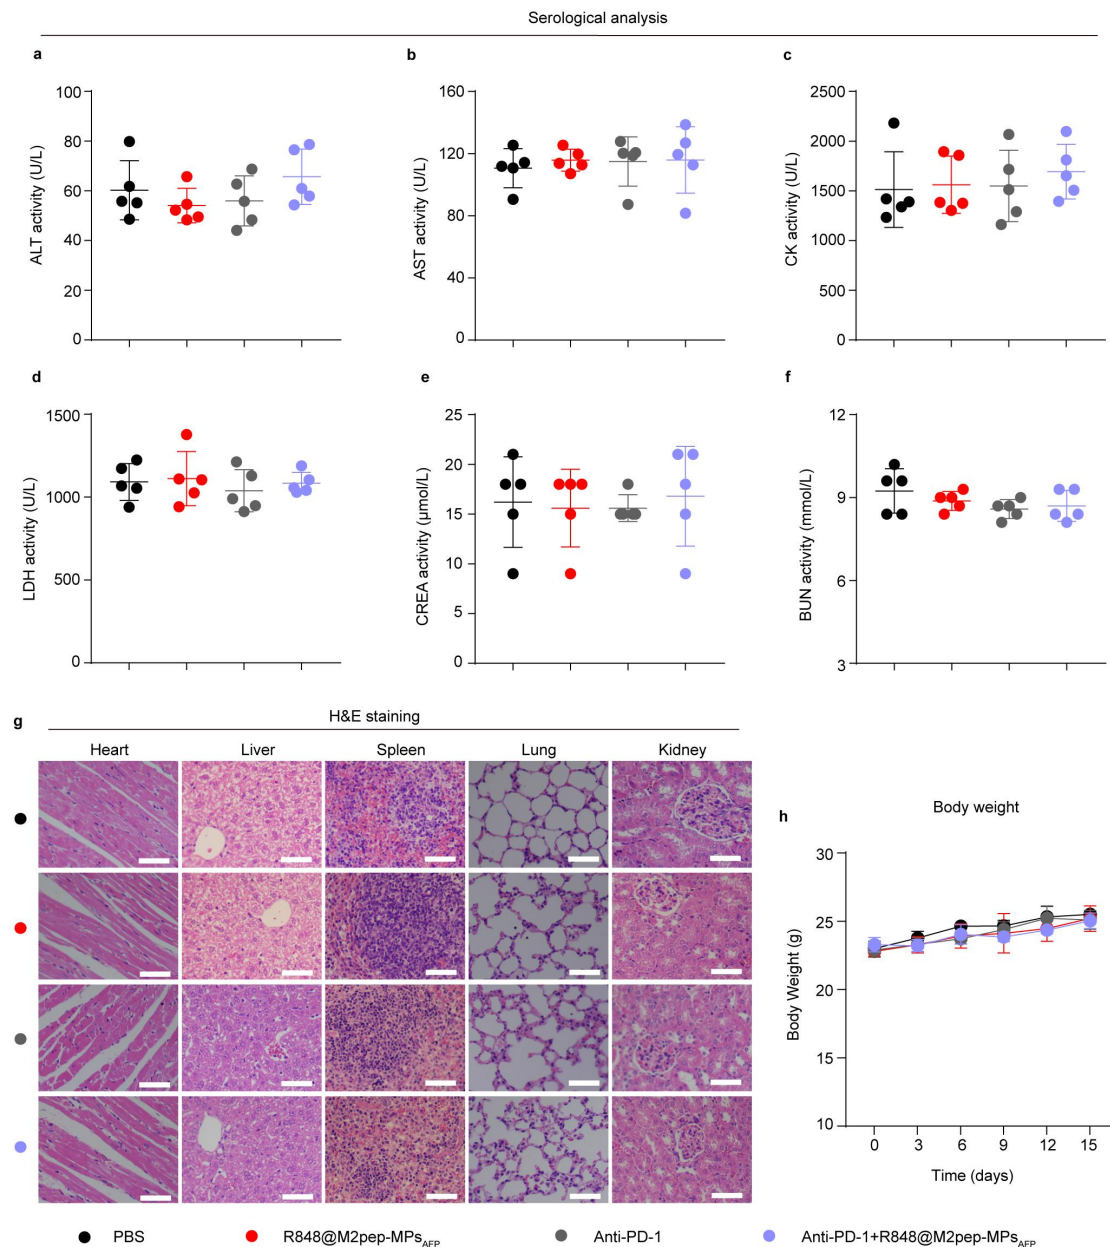

**Supplementary Fig. 35 Biosafety of combination of R848@M2pep-MPs<sub>AFP</sub> and anti-PD-1 antibody in orthotopic Hepa1-6 tumor-bearing mice. (a-f)** The activity of ALT (a), AST (b), CK (c), LDH (d), CREA (e) and BUN (f) in serum of orthotopic Hepa1-6 tumor-bearing mice after treatment with PBS, R848@M2pep-MPs<sub>AFP</sub>, anti-PD-1 antibody or a combination of R848@M2pep-MPs<sub>AFP</sub> and anti-PD-1 antibody at the anti-PD-1 antibody dosage of 5 mg kg<sup>-1</sup> and R848 dosage of 0.5 mg kg<sup>-1</sup> indicated in Fig. 6a. Data are presented as means  $\pm$  s.d. (n = 5 mice per group;

one-way ANOVA followed by Tukey's HSD post-hoc test). (g) H&E staining of major organs in orthotopic Hepa1-6 tumor-bearing mice after treatment indicated in Fig. 6a. Images are representative of 3 biologically independent mice. Scale bars: 20  $\mu$ m. (h) Body weight of orthotopic Hepa1-6 tumor-bearing mice during the treatment as indicated in Fig. 6a. Data are presented as means  $\pm$  s.d. (n = 5 mice per group). Source data are provided as a Source Data file.

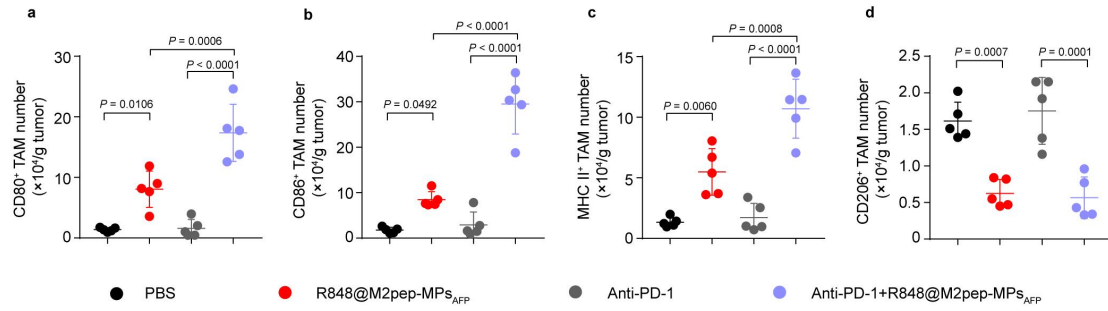

**Supplementary Fig. 36 Improved tumor immune microenvironment by combination of anti-PD-1 antibody and R848@M2pep-MPs<sub>AFP</sub> in orthotopic Hepa1-6 tumor-bearing mice. (a-d)** The numbers of CD80<sup>+</sup> TAMs (a), CD86<sup>+</sup> TAMs (b), MHC II<sup>+</sup> TAMs (c) and CD206<sup>+</sup> TAMs (d) in tumor tissues of orthotopic Hepa1-6 tumor-bearing mice after treatment with PBS, R848@M2pep-MPs<sub>AFP</sub>, anti-PD-1 antibody or a combination of R848@M2pep-MPs<sub>AFP</sub> and anti-PD-1 antibody at the anti-PD-1 antibody dosage of 5 mg kg<sup>-1</sup> and R848 dosage of 0.5 mg kg<sup>-1</sup> indicated in Fig. 6a. Data are presented as means ± s.d. (n = 5 mice per group; one-way ANOVA followed by Tukey's HSD post-hoc test). Source data are provided as a Source Data file.



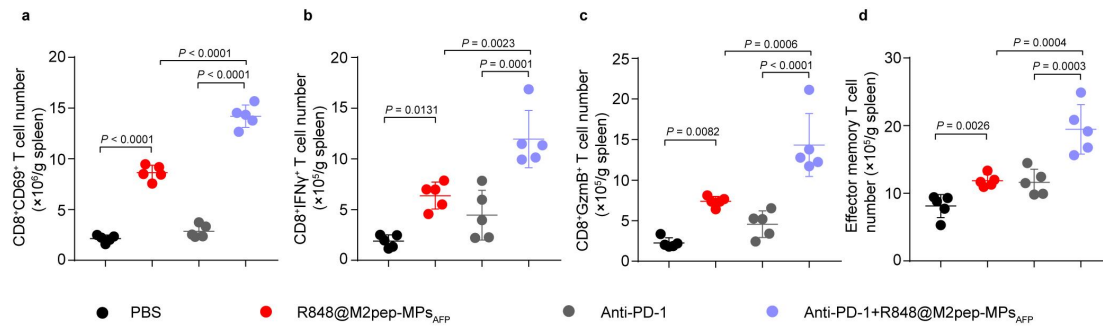

**Supplementary Fig. 37 Improved systemic antitumor immunity by combination of anti-PD-1 antibody and R848@M2pep-MPs<sub>AFP</sub> in orthotopic Hepa1-6 tumor-bearing mice. (a-d) The numbers of CD8<sup>+</sup>CD69<sup>+</sup> T cells (a), CD8<sup>+</sup>IFNγ<sup>+</sup> T cells (b), CD8<sup>+</sup>GzmB<sup>+</sup> T cells (c) and effector memory T cells (gated as CD45<sup>+</sup>CD3<sup>+</sup>CD8<sup>+</sup>CD44<sup>+</sup>CD62L<sup>-</sup>, d) in spleens of orthotopic Hepa1-6 tumor-bearing mice after treatment with PBS, R848@M2pep-MPs<sub>AFP</sub>, anti-PD-1 antibody or a combination of R848@M2pep-MPs<sub>AFP</sub> and anti-PD-1 antibody at the anti-PD-1 antibody dosage of 5 mg kg<sup>-1</sup> and R848 dosage of 0.5 mg kg<sup>-1</sup> indicated in Fig. 6a. Data are presented as means ± s.d. (n = 5 mice per group; one-way ANOVA followed by Tukey's HSD post-hoc test). Source data are provided as a Source Data file.**

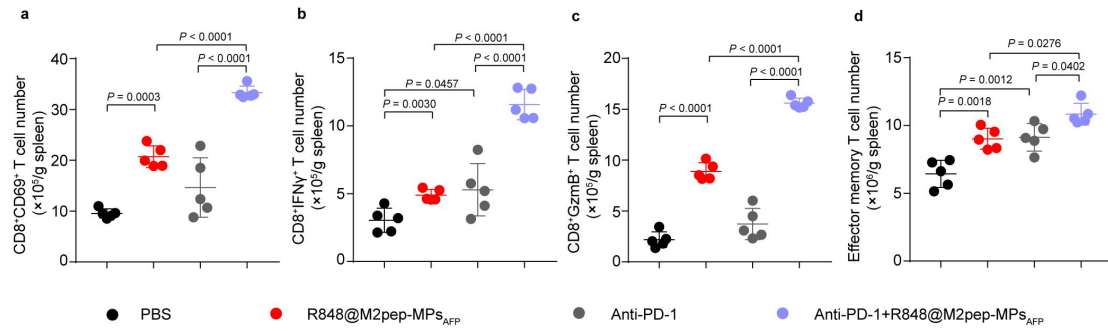

**Supplementary Fig. 38 Improved systemic antitumor immunity by combination of anti-PD-1 antibody and R848@M2pep-MPs<sub>AFP</sub> in DEN-induced autochthonous HCC mice.** (a-d) The numbers of CD8<sup>+</sup>CD69<sup>+</sup> T cells (a), CD8<sup>+</sup>IFNγ<sup>+</sup> T cells (b), CD8<sup>+</sup>GzmB<sup>+</sup> T cells (c) and effector memory T cells (d) in spleens of DEN-induced autochthonous HCC mice after treatment with PBS, R848@M2pep-MPs<sub>AFP</sub>, anti-PD-1 antibody or a combination of R848@M2pep-MPs<sub>AFP</sub> and anti-PD-1 antibody at the anti-PD-1 antibody dosage of 5 mg kg<sup>-1</sup> and R848 dosage of 0.5 mg kg<sup>-1</sup> indicated in Fig. 7a. Data are presented as means ± s.d. (n = 5 mice per group; one-way ANOVA followed by Tukey's HSD post-hoc test). Source data are provided as a Source Data file.

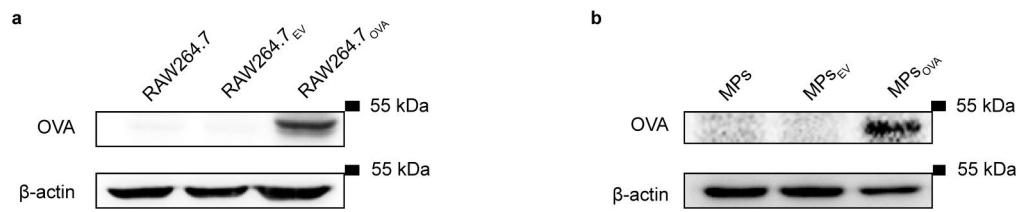

**Supplementary Fig. 39 OVA expression in RAW264.7<sub>OVA</sub> cells and MP<sub>SOVA</sub>. (a)**

OVA expression in RAW264.7, RAW264.7<sub>EV</sub> and RAW264.7<sub>OVA</sub> cells by western blotting. **(b)** OVA expression in MPs, MP<sub>SEV</sub> and MP<sub>SOVA</sub> by western blotting. Images are representative of three independent samples.

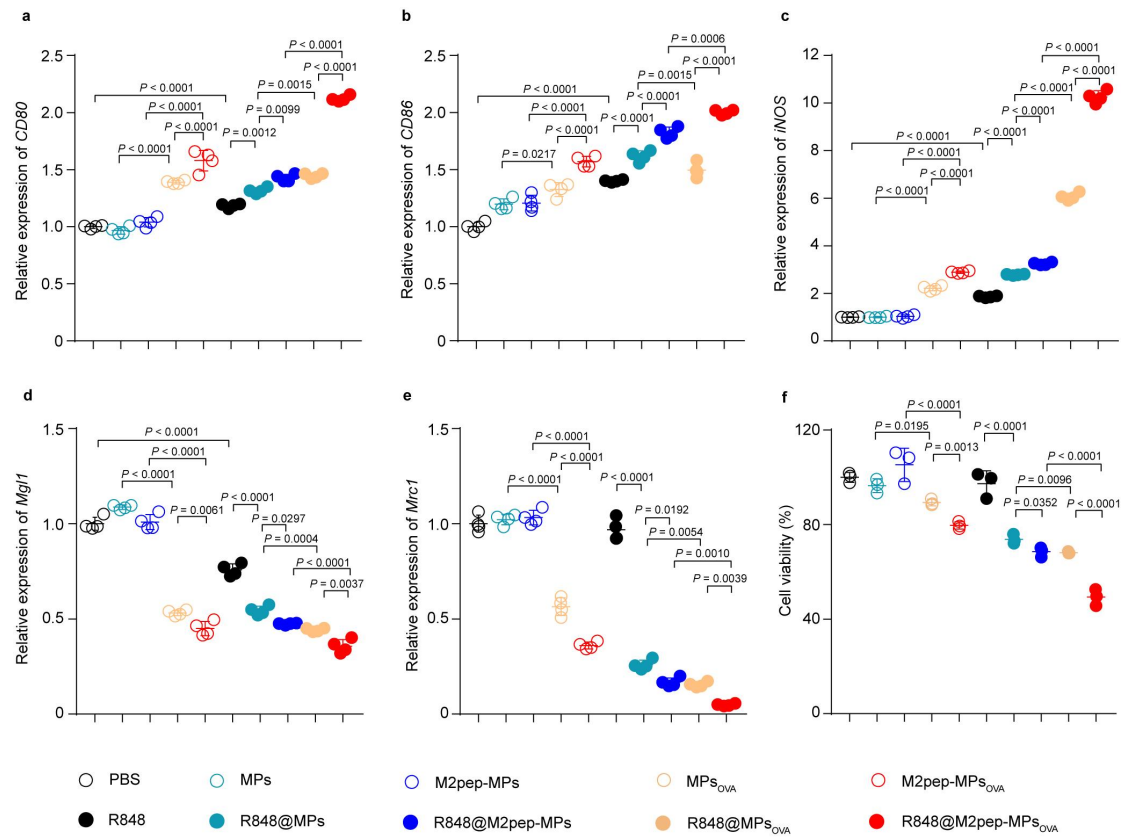

**Supplementary Fig. 40 Reprogramming of M2-like macrophages to M1-like phenotype by R848@M2pep-MPs<sub>soVA</sub>.** (a-e) The mRNA expression levels of *CD80* (a), *CD86* (b), *iNOS* (c), *Mgl1* (d) and *Mrc1* (e) in IL-4-stimulated RAW264.7 cells after treatment with PBS, MPs, M2pep-MPs, MP<sub>soVA</sub>, M2pep-MP<sub>soVA</sub>, R848, R848@MPs, R848@M2pep-MPs, R848@MP<sub>soVA</sub> or R848@M2pep-MP<sub>soVA</sub> at the R848 concentration of 2 nM for 24 h by RT-qPCR. Data are presented as means  $\pm$  s.d. (n = 4 biological independent samples; one-way ANOVA followed by Tukey's HSD post-hoc test). (f) Cell viability of B16-OVA cells at 24 h after treatment with the supernatants of the above treated IL-4-stimulated RAW264.7 cells by CCK-8 assay. Data are presented as means  $\pm$  s.d. (n = 3 biological independent samples; one-way ANOVA followed by Tukey's HSD post-hoc test). Source data are provided as a Source Data file.

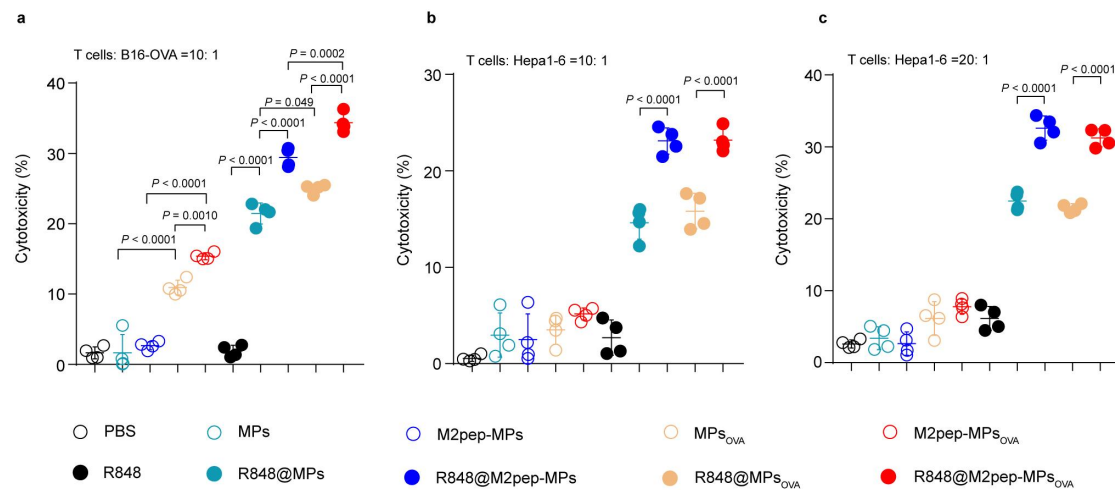

**Supplementary Fig. 41 Cytotoxicity of activated CD8<sup>+</sup> T cells by R848@M2pep-MPs<sub>OVA</sub>-reprogrammed M2-like macrophages against B16-OVA or Hepa1-6 cells. (a-c)** Cytotoxicity of CD8<sup>+</sup> T cells against B16-OVA or Hepa1-6 cells when the CD8<sup>+</sup> T cells cocultured with PBS-, MPs-, M2pep-MPs-, MPs<sub>OVA</sub>-, M2pep-MPs<sub>OVA</sub>-, R848-, R848@MPs-, R848@M2pep-MPs-, R848@MPs<sub>OVA</sub>- or R848@M2pep-MPs<sub>OVA</sub>-pretreated IL-4-stimulated RAW264.7 cells (R848 concentration at 2 nM for 24 h) for 5 days were incubated with B16-OVA or Hepa1-6 cells at the effector/target ratio of 10:1 (a,b) and 20:1 (c) for 6 h by LDH assay. Data are presented as means  $\pm$  s.d. (n = 4 biological independent samples; one-way ANOVA followed by Tukey's HSD post-hoc test). Source data are provided as a Source Data file.

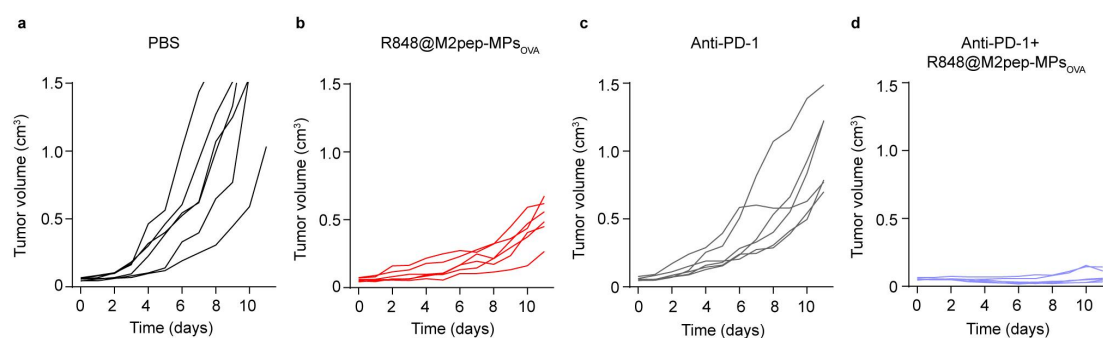

**Supplementary Fig. 42 Antitumor effects of combination of R848@M2pep-MPs<sub>OVA</sub> and anti-PD-1 antibody in B16-OVA tumor-bearing mice.**

**(a-d)** Individual tumor growth curves of B16-OVA tumor-bearing mice after treatment with PBS **(a)**, R848@M2pep-MPs<sub>OVA</sub> **(b)**, anti-PD-1 antibody **(c)** or a combination of R848@M2pep-MPs<sub>OVA</sub> and anti-PD-1 antibody **(d)** at the anti-PD-1 antibody dosage of 5 mg kg<sup>-1</sup> and R848 dosage of 0.5 mg kg<sup>-1</sup> indicated in Fig. **8i**. (n = 6 mice per group). Source data are provided as a Source Data file.

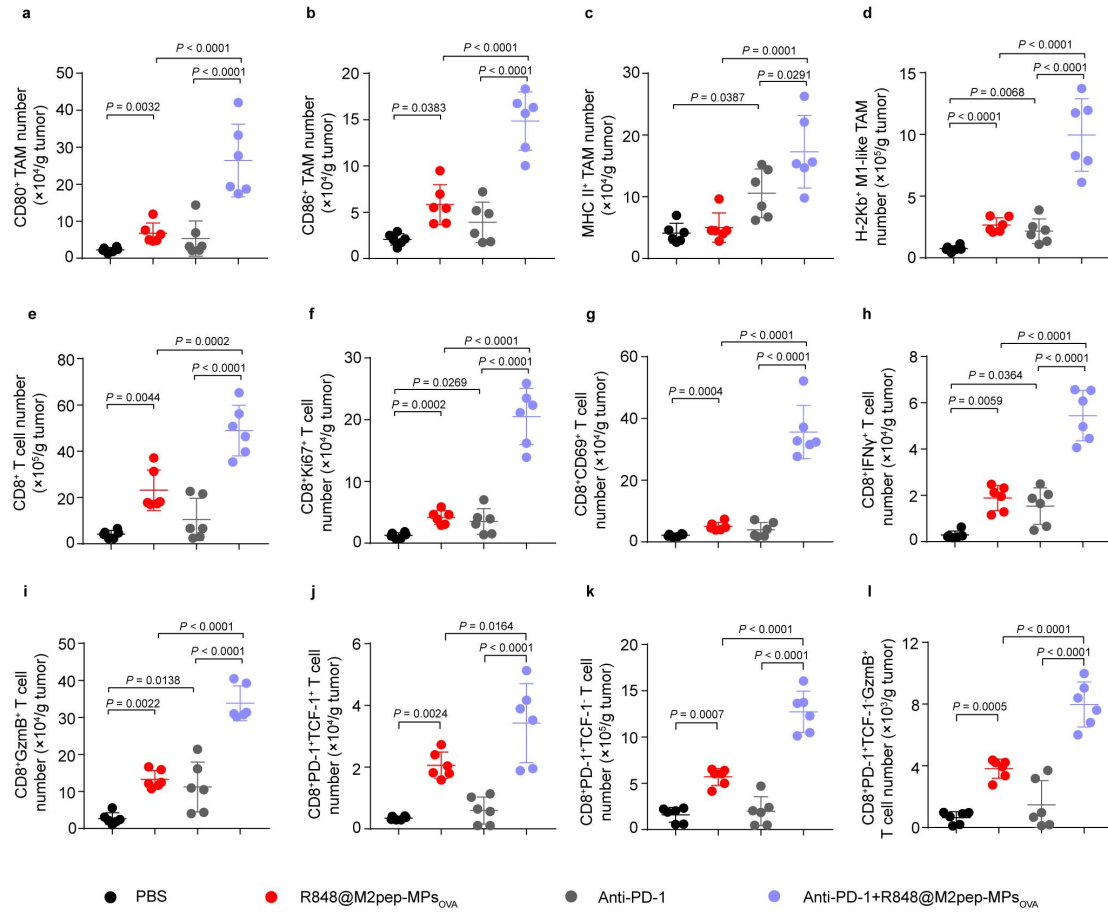

**Supplementary Fig. 43 Improved tumor immune microenvironment induced by combination of R848@M2pep-MPs<sub>OVA</sub> and anti-PD-1 antibody in B16-OVA tumor-bearing mice.** (a-l) The numbers of CD80<sup>+</sup> TAMs (a), CD86<sup>+</sup> TAMs (b), MHC II<sup>+</sup> TAMs (c), H-2Kb<sup>+</sup> M1-like TAMs (d), CD8<sup>+</sup> T cells (e), CD8<sup>+</sup>Ki67<sup>+</sup> T cells (f), CD8<sup>+</sup>CD69<sup>+</sup> T cells (g), CD8<sup>+</sup>IFN $\gamma$ <sup>+</sup> T cells (h), CD8<sup>+</sup>GzmB<sup>+</sup> T cells (i), CD8<sup>+</sup>PD-1<sup>+</sup>TCF-1<sup>+</sup> T cells (j), CD8<sup>+</sup>PD-1<sup>+</sup>TCF-1<sup>-</sup> T cells (k) and CD8<sup>+</sup>PD-1<sup>+</sup>TCF-1<sup>-</sup>GzmB<sup>+</sup> T cells (l) in tumor tissues of B16-OVA tumor-bearing mice at 11 days after treatment with PBS, R848@M2pep-MPs<sub>OVA</sub>, anti-PD-1 antibody or a combination of R848@M2pep-MPs<sub>OVA</sub> and anti-PD-1 antibody at the anti-PD-1 antibody dosage of 5 mg kg<sup>-1</sup> and R848 dosage of 0.5 mg kg<sup>-1</sup> indicated in Fig. 8i. Data are presented as means  $\pm$  s.d. (n = 6 mice per group; one-way ANOVA followed by Tukey's HSD post-hoc test). Source data are provided as a Source Data file.

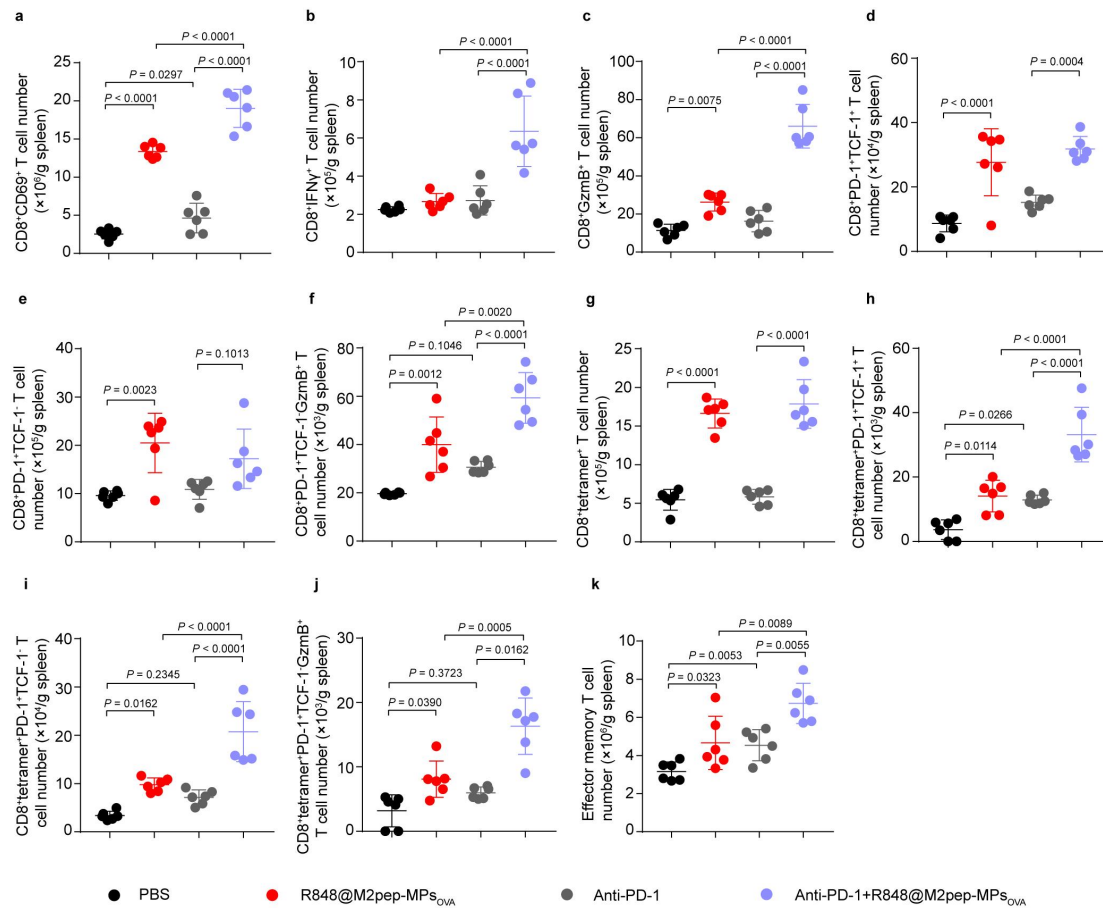

**Supplementary Fig. 44 Improved immune microenvironment in spleens of B16-OVA tumor-bearing mice after treatment with R848@M2pep-MPs<sub>OVA</sub> and anti-PD-1 antibody.** (a-k) The numbers of CD8<sup>+</sup>CD69<sup>+</sup> T cells (a), CD8<sup>+</sup>IFN $\gamma$ <sup>+</sup> T cells (b), CD8<sup>+</sup>GzmB<sup>+</sup> T cells (c), CD8<sup>+</sup>PD-1<sup>+</sup>TCF-1<sup>+</sup> T cells (d), CD8<sup>+</sup>PD-1<sup>+</sup>TCF-1<sup>+</sup> T cells (e), CD8<sup>+</sup>PD-1<sup>+</sup>TCF-1<sup>+</sup>GzmB<sup>+</sup> T cells (f), CD8<sup>+</sup>tetramer<sup>+</sup> T cells (g), CD8<sup>+</sup>tetramer<sup>+</sup>PD-1<sup>+</sup>TCF-1<sup>+</sup> T cells (h), CD8<sup>+</sup>tetramer<sup>+</sup>PD-1<sup>+</sup>TCF-1<sup>+</sup> T cells (i), CD8<sup>+</sup>tetramer<sup>+</sup>PD-1<sup>+</sup>TCF-1<sup>+</sup>GzmB<sup>+</sup> T cells (j) and effector memory T cells (k) in spleens of B16-OVA tumor-bearing mice at 11 days after treatment with PBS, R848@M2pep-MPs<sub>OVA</sub>, anti-PD-1 antibody, or a combination of R848@M2pep-MPs<sub>OVA</sub> and anti-PD-1 antibody at the anti-PD-1 antibody dosage of 5 mg kg<sup>-1</sup> and R848 dosage of 0.5 mg kg<sup>-1</sup> indicated in Fig. 8i. Data are presented as means  $\pm$  s.d. (n = 6 mice per group; one-way ANOVA followed by Tukey's HSD post-hoc test). Source data are provided as a Source Data file.



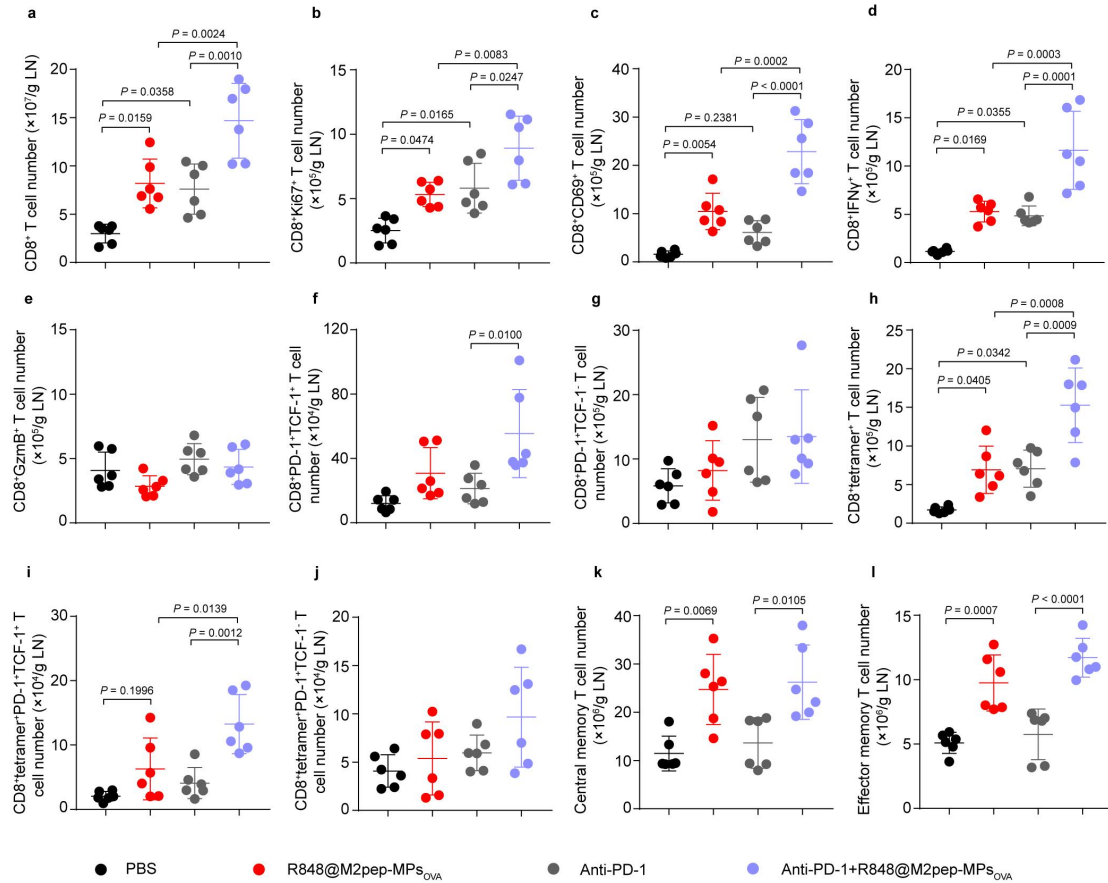

**Supplementary Fig. 45 Improved tumor immune microenvironment in tumor-draining lymph nodes by combination of R848@M2pep-MPs<sub>OVA</sub> and anti-PD-1 antibody in B16-OVA tumor-bearing mice.** (a-l) The numbers of CD8<sup>+</sup> T cells (a), CD8<sup>+</sup>Ki67<sup>+</sup> T cells (b), CD8<sup>+</sup>CD69<sup>+</sup> T cells (c), CD8<sup>+</sup>IFN $\gamma$ <sup>+</sup> T cells (d), CD8<sup>+</sup>GzmB<sup>+</sup> T cells (e), CD8<sup>+</sup>PD-1<sup>+</sup>TCF-1<sup>+</sup> T cells (f), CD8<sup>+</sup>PD-1<sup>+</sup>TCF-1<sup>-</sup> T cells (g), CD8<sup>+</sup>tetramer<sup>+</sup> T cells (h), CD8<sup>+</sup>tetramer<sup>+</sup>PD-1<sup>+</sup>TCF-1<sup>+</sup> T cells (i), CD8<sup>+</sup>tetramer<sup>+</sup>PD-1<sup>+</sup>TCF-1<sup>-</sup> T cells (j), Tcm cells (k) and Tem cells (l) in tumor-draining lymph nodes of B16-OVA tumor-bearing mice at 11 days after treatment with PBS, R848@M2pep-MPs<sub>OVA</sub>, anti-PD-1 antibody, or a combination of R848@M2pep-MPs<sub>OVA</sub> and anti-PD-1 antibody at the anti-PD-1 antibody dosage of 5 mg kg<sup>-1</sup> and R848 dosage of 0.5 mg kg<sup>-1</sup> indicated in Fig. 8i. Data are presented as means  $\pm$  s.d. (n = 6 mice per group; one-way ANOVA followed by Tukey's HSD post-hoc test). Source data are provided as a Source Data file.

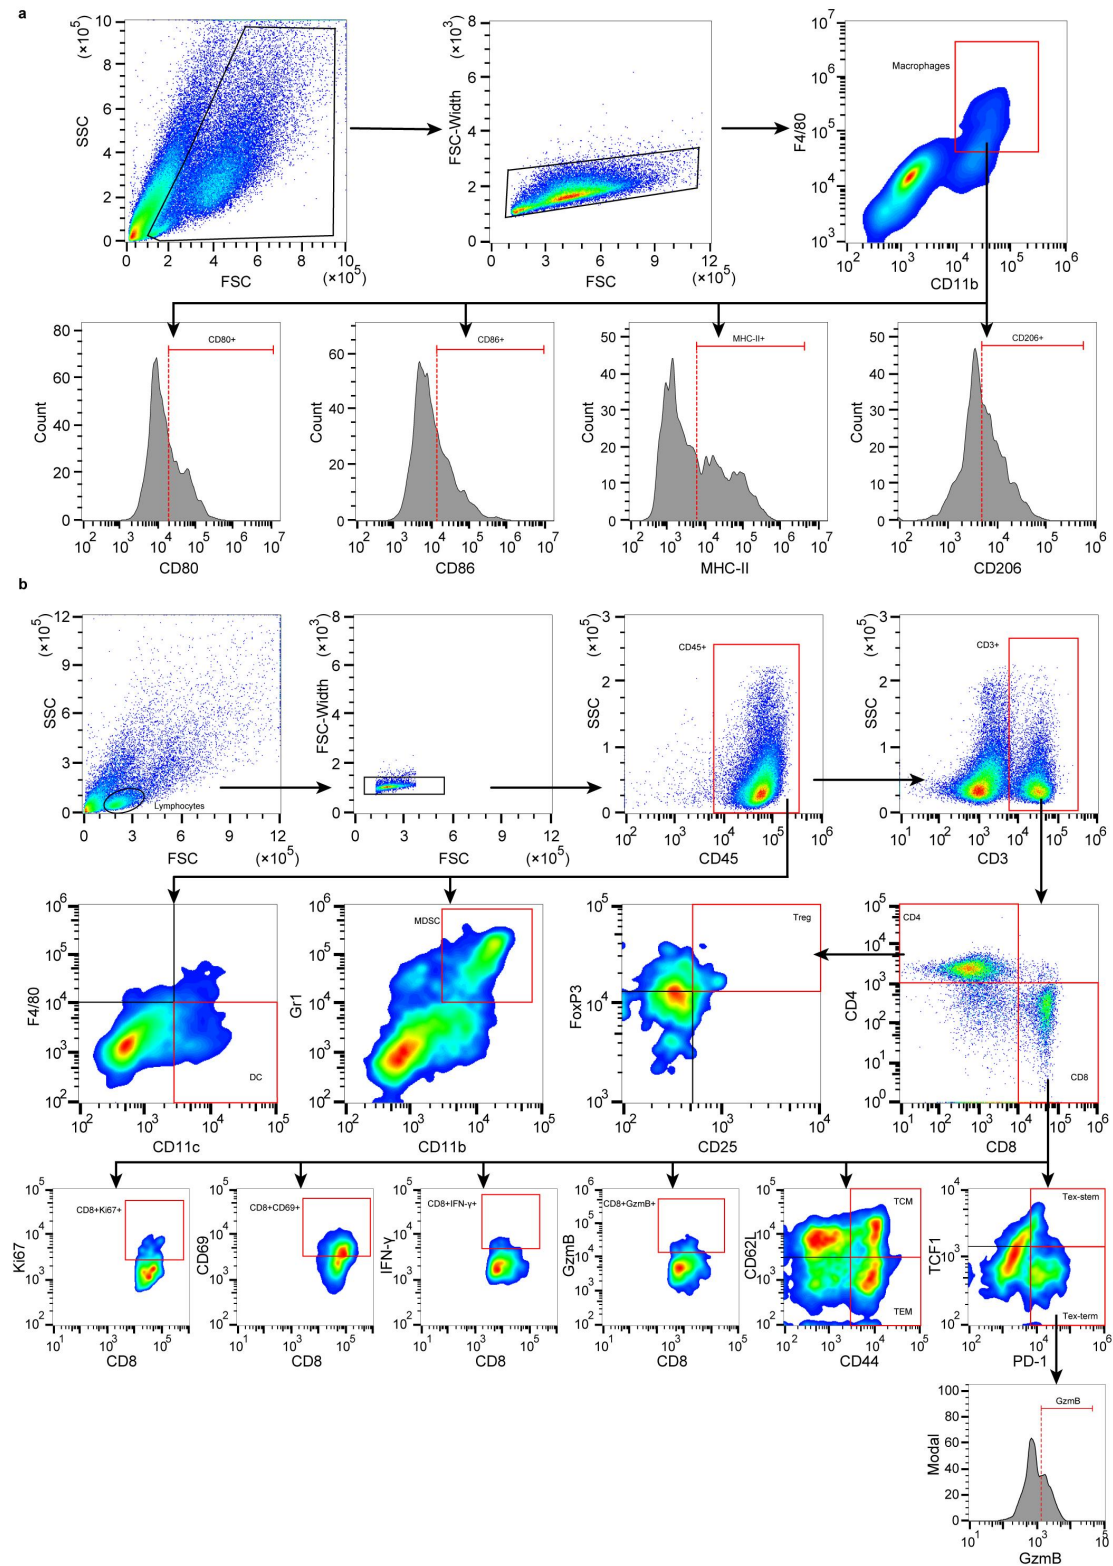

**Supplementary Fig. 46 Gating strategy for identifying major immune cell populations in tumor tissues of tumor-bearing mice. (a) Gating strategy for identifying M1- and M2-like TAMs in tumor tissues of tumor-bearing mice presented**

on Fig. 3g, h, 4b-e, 7g-j, 8l and Supplementary Fig. 28d, 36a-d and 43a-d. **(b)** Gating strategy for identifying DCs ( $CD45^+F4/80^-CD11c^+$  cells), MDSCs ( $CD45^+CD11b^+Gr1^+$  cells), Tregs ( $CD45^+CD3^+CD4^+CD25^+FoxP3^+$  cells),  $CD4^+$  T cells ( $CD45^+CD3^+CD4^+$  cells),  $CD8^+$  T cells ( $CD45^+CD3^+CD4^+$  cells),  $CD8^+CD69^+$  T cells ( $CD45^+CD3^+CD8^+CD69^+$  cells),  $CD8^+Ki67^+$  T cells ( $CD45^+CD3^+CD8^+Ki67^+$  cells),  $CD8^+IFN\gamma^+$  T cells ( $CD45^+CD3^+CD8^+IFN\gamma^+$  cells),  $CD8^+GzmB^+$  T cells ( $CD45^+CD3^+CD8^+GzmB^+$  cells), Tem cells ( $CD45^+CD3^+CD8^+CD44^+CD62L^-$  cells), Tem cells ( $CD45^+CD3^+CD8^+CD44^+CD62L^+$  cells), stem-like  $CD8^+$  T cells ( $CD45^+CD3^+CD8^+PD-1^+TCF-1^+$  cells), terminally exhausted  $CD8^+$  T cells ( $CD45^+CD3^+CD8^+PD-1^+TCF-1^-$  cells) and terminally exhausted  $CD8^+$  T cells secreting GzmB ( $CD45^+CD3^+CD8^+PD-1^+TCF-1^-GzmB^+$  T cells) in tumors, spleens or lymph nodes of tumor-bearing mice presented on Fig. 3g, 5e-l, 6e-l, 7k-r, 8l and Supplementary Fig. 24a-d, 25a-c, 28e-i, 31f, 37a-d, 38a-d, 43e-l, 44a-f, k and 45a-g, k, l.
